# Supplementary material for: Theoretical studies on the inactivation mechanism of γ-aminobutyric acid aminotransferase
Source: Royal Society of Chemistry journal article supplement (doi:10.1039/c1ob05146f), 2011-01-01
Supplement: c1ob05146f.pdf [file c1ob05146f.pdf]

## SUPPORTING INFORMATION

|                                                                                                                                                                                                                         |    |
|-------------------------------------------------------------------------------------------------------------------------------------------------------------------------------------------------------------------------|----|
| Table 1: Cartesian coordinates and energies for the structure 'EP01'                                                                                                                                                    | 3  |
| Table 2: Cartesian coordinates and energies for the structure 'V01'                                                                                                                                                     | 3  |
| Table 3: Cartesian coordinates and energies of for the structure 'pre-reaction complex'                                                                                                                                 | 4  |
| Table 4: Cartesian coordinates and energies for the structure '00TS01'                                                                                                                                                  | 5  |
| Table 5: Cartesian coordinates and energies for the structure '01'                                                                                                                                                      | 6  |
| Table 6: Cartesian coordinates and energies for the structure '01TS02'                                                                                                                                                  | 7  |
| Table 7: Cartesian coordinates and energies for the structure '01TS02_H <sub>2</sub> O'                                                                                                                                 | 9  |
| Table 8: Cartesian coordinates and energies for the structure '02a'                                                                                                                                                     | 10 |
| Table 9: Cartesian coordinates and energies for the structure '02b'                                                                                                                                                     | 11 |
| Table 10: Cartesian coordinates and energies for the structure '02TS03'                                                                                                                                                 | 12 |
| Table 11: Cartesian coordinates and energies for the structure '03a'                                                                                                                                                    | 13 |
| Table 12: Cartesian coordinates and energies for the structure '03TS04'                                                                                                                                                 | 14 |
| Table 13: Cartesian coordinates and energies for the structure '03TS04_H <sub>2</sub> O'                                                                                                                                | 15 |
| Table 14: Cartesian coordinates and energies for the structure '04'                                                                                                                                                     | 17 |
| Table 15: Cartesian coordinates and energies for the structure '04_H <sub>2</sub> O'                                                                                                                                    | 18 |
| Table 16: Cartesian coordinates and energies for the structure '03r03'                                                                                                                                                  | 19 |
| Table 17: Cartesian coordinates and energies for the structure '03b'                                                                                                                                                    | 20 |
| Table 18: Cartesian coordinates and energies for the structure '03TS05'                                                                                                                                                 | 21 |
| Table 19: Cartesian coordinates and energies for the structure '03TS05_2H <sub>2</sub> O'                                                                                                                               | 22 |
| Table 20: Cartesian coordinates and energies for the structure '05a'                                                                                                                                                    | 23 |
| Table 21: Cartesian coordinates and energies for the structure '05TS06'                                                                                                                                                 | 24 |
| Table 22: Cartesian coordinates and energies for the structure '05TS06_H <sub>2</sub> O'                                                                                                                                | 25 |
| Table 23: Cartesian coordinates and energies for the structure '06'                                                                                                                                                     | 27 |
| Table 24: Cartesian coordinates and energies for the structure '05br05a'                                                                                                                                                | 28 |
| Table 25: Cartesian coordinates and energies for the structure '05b'                                                                                                                                                    | 29 |
| Table 26: Cartesian coordinates and energies for the structure '05TS07'                                                                                                                                                 | 30 |
| Table 27: Cartesian coordinates and energies for the structure '07'                                                                                                                                                     | 31 |
| Table 28: Cartesian coordinates and energies for the structure '07TS08'                                                                                                                                                 | 32 |
| Table 29: Cartesian coordinates and energies for the structure '07TS08_H <sub>2</sub> O'                                                                                                                                | 33 |
| Table 30: Cartesian coordinates and energies for the structure '08a'                                                                                                                                                    | 34 |
| Table 31: Cartesian coordinates and energies for the structure '08b'                                                                                                                                                    | 36 |
| Table 32: Cartesian coordinates and energies for the structure '08TS09'                                                                                                                                                 | 37 |
| Table 33: Cartesian coordinates and energies for the structure '09'                                                                                                                                                     | 38 |
| Table 34: Cartesian coordinates and energies for the structure '09TS10'                                                                                                                                                 | 39 |
| Table 35: Cartesian coordinates and energies for the structure '10'                                                                                                                                                     | 40 |
| Table 36: NBO charges on heavy atoms                                                                                                                                                                                    | 42 |
| Table 37: NBO charges on oxygen and hydrogen atoms of water molecules                                                                                                                                                   | 43 |
| Table 38: NBO Energetic analysis with hyperconjugative delocalizations involving the acceptor and donor NBOs                                                                                                            | 44 |
| Figure 1: Single point relative MP2 energies for External Aldimine Formation Pathway (Relative Gibbs free energies from gas phase optimization calculations are written in parantheses, energies are given in kcal/mol) | 47 |

|                                                                                                                                                                                                                            |    |
|----------------------------------------------------------------------------------------------------------------------------------------------------------------------------------------------------------------------------|----|
| Figure 2: Single point relative MP2 energies for Michael Addition Pathway (Relative Gibbs free energies from gas phase optimization calculations are written in parantheses, energies are given in kcal/mol) .....         | 47 |
| Figure 3: Single point relative MP2 energies for Enamine Michael Addition Pathway (Relative Gibbs free energies from gas phase optimization calculations are written in parantheses, energies are given in kcal/mol) ..... | 48 |
| Figure 4: Single point relative MP2 energies for Enamine Pathway (Relative Gibbs free energies from gas phase optimization calculations are written in parantheses, energies are given in kcal/mol) .....                  | 49 |

**Table 1: Cartesian coordinates and energies for the structure 'EP01'**

Standard orientation:

| Center<br>Number                             | Atomic<br>Number | Atomic<br>Type | Coordinates (Angstroms) |           |           |
|----------------------------------------------|------------------|----------------|-------------------------|-----------|-----------|
|                                              |                  |                | X                       | Y         | Z         |
| 1                                            | 7                | 0              | 2.180464                | -1.142789 | 0.000000  |
| 2                                            | 6                | 0              | 1.000614                | -1.755348 | 0.000000  |
| 3                                            | 6                | 0              | 0.901732                | -3.238964 | 0.000000  |
| 4                                            | 6                | 0              | -0.199467               | -0.924611 | 0.000000  |
| 5                                            | 8                | 0              | -1.328529               | -1.479485 | 0.000000  |
| 6                                            | 6                | 0              | 0.000000                | 0.512578  | 0.000000  |
| 7                                            | 6                | 0              | -1.157520               | 1.353502  | 0.000000  |
| 8                                            | 6                | 0              | 1.312594                | 1.075358  | 0.000000  |
| 9                                            | 6                | 0              | 1.563276                | 2.563608  | 0.000000  |
| 10                                           | 6                | 0              | 2.387171                | 0.216738  | 0.000000  |
| 11                                           | 1                | 0              | 1.133957                | 3.042611  | 0.886412  |
| 12                                           | 1                | 0              | 3.419141                | 0.538859  | 0.000000  |
| 13                                           | 1                | 0              | 3.009842                | -1.732469 | 0.000000  |
| 14                                           | 1                | 0              | -4.184704               | 1.448892  | 0.888998  |
| 15                                           | 1                | 0              | -4.184704               | 1.448892  | -0.888998 |
| 16                                           | 6                | 0              | -3.594117               | 1.686044  | 0.000000  |
| 17                                           | 7                | 0              | -2.375496               | 0.882447  | 0.000000  |
| 18                                           | 1                | 0              | -2.415379               | -0.158981 | 0.000000  |
| 19                                           | 1                | 0              | -3.342819               | 2.748118  | 0.000000  |
| 20                                           | 1                | 0              | 1.883307                | -3.719409 | 0.000000  |
| 21                                           | 1                | 0              | 0.334008                | -3.572976 | 0.875245  |
| 22                                           | 1                | 0              | 0.334008                | -3.572976 | -0.875245 |
| 23                                           | 1                | 0              | -1.046757               | 2.435345  | 0.000000  |
| 24                                           | 1                | 0              | 2.633906                | 2.776320  | 0.000000  |
| 25                                           | 1                | 0              | 1.133957                | 3.042611  | -0.886412 |
| Sum of electronic and zero-point Energies=   |                  |                | -535.128658             |           |           |
| Sum of electronic and thermal Energies=      |                  |                | -535.116575             |           |           |
| Sum of electronic and thermal Enthalpies=    |                  |                | -535.115631             |           |           |
| Sum of electronic and thermal Free Energies= |                  |                | -535.166317             |           |           |

**Table 2: Cartesian coordinates and energies for the structure 'V01'**

Standard orientation:

| Center<br>Number | Atomic<br>Number | Atomic<br>Type | Coordinates (Angstroms) |           |           |
|------------------|------------------|----------------|-------------------------|-----------|-----------|
|                  |                  |                | X                       | Y         | Z         |
| 1                | 7                | 0              | 2.407386                | -1.637988 | -0.318885 |
| 2                | 6                | 0              | 1.595013                | -0.408113 | -0.365185 |
| 3                | 6                | 0              | 0.133459                | -0.787747 | -0.068382 |
| 4                | 6                | 0              | -0.852640               | 0.351403  | -0.330058 |
| 5                | 6                | 0              | -2.272428               | 0.012750  | 0.060274  |

|                                              |   |   |           |             |           |
|----------------------------------------------|---|---|-----------|-------------|-----------|
| 6                                            | 8 | 0 | -3.152936 | 0.937559    | -0.406497 |
| 7                                            | 6 | 0 | 2.106789  | 0.668061    | 0.566846  |
| 8                                            | 6 | 0 | 2.602395  | 1.849524    | 0.184142  |
| 9                                            | 8 | 0 | -2.629787 | -0.941164   | 0.719357  |
| 10                                           | 1 | 0 | 2.982786  | 2.570982    | 0.901604  |
| 11                                           | 1 | 0 | 2.646206  | 2.134333    | -0.865357 |
| 12                                           | 1 | 0 | 2.081969  | 0.415319    | 1.629652  |
| 13                                           | 1 | 0 | 1.656273  | -0.029142   | -1.394849 |
| 14                                           | 1 | 0 | -0.123330 | -1.654324   | -0.686435 |
| 15                                           | 1 | 0 | 0.043017  | -1.113331   | 0.975833  |
| 16                                           | 1 | 0 | 3.392413  | -1.420150   | -0.447418 |
| 17                                           | 1 | 0 | 2.316747  | -2.097459   | 0.585582  |
| 18                                           | 1 | 0 | -0.851986 | 0.648982    | -1.385456 |
| 19                                           | 1 | 0 | -0.573638 | 1.254100    | 0.229617  |
| 20                                           | 1 | 0 | -4.035904 | 0.670179    | -0.099275 |
| -----                                        |   |   |           |             |           |
| Sum of electronic and zero-point Energies=   |   |   |           | -440.322595 |           |
| Sum of electronic and thermal Energies=      |   |   |           | -440.312193 |           |
| Sum of electronic and thermal Enthalpies=    |   |   |           | -440.311249 |           |
| Sum of electronic and thermal Free Energies= |   |   |           | -440.359805 |           |

**Table 3: Cartesian coordinates and energies of for the structure ‘pre-reaction complex’**

Standard orientation:

| -----            |                  |                |                         |           |           |  |
|------------------|------------------|----------------|-------------------------|-----------|-----------|--|
| Center<br>Number | Atomic<br>Number | Atomic<br>Type | Coordinates (Angstroms) |           |           |  |
|                  |                  |                | X                       | Y         | Z         |  |
| -----            |                  |                |                         |           |           |  |
| 1                | 6                | 0              | 3.103065                | -0.342550 | 0.297261  |  |
| 2                | 6                | 0              | 2.108778                | -0.882747 | 1.170791  |  |
| 3                | 6                | 0              | 0.877122                | -0.274491 | 1.200596  |  |
| 4                | 7                | 0              | 0.617872                | 0.820508  | 0.413598  |  |
| 5                | 6                | 0              | 1.479206                | 1.386226  | -0.421650 |  |
| 6                | 6                | 0              | 2.815583                | 0.810271  | -0.534287 |  |
| 7                | 6                | 0              | 2.360541                | -2.085151 | 2.046874  |  |
| 8                | 6                | 0              | 1.098830                | 2.579038  | -1.227676 |  |
| 9                | 8                | 0              | 3.645266                | 1.327397  | -1.329602 |  |
| 10               | 6                | 0              | 4.404200                | -0.923205 | 0.217007  |  |
| 11               | 7                | 0              | 5.339390                | -0.462481 | -0.572786 |  |
| 12               | 6                | 0              | 6.685055                | -1.010789 | -0.698112 |  |
| 13               | 7                | 0              | -2.890086               | -2.861828 | -0.381950 |  |
| 14               | 6                | 0              | -3.853730               | -1.761164 | -0.186526 |  |
| 15               | 6                | 0              | -3.043639               | -0.466553 | 0.014955  |  |
| 16               | 6                | 0              | -3.896572               | 0.739878  | 0.405739  |  |
| 17               | 6                | 0              | -3.100660               | 1.991267  | 0.668306  |  |
| 18               | 8                | 0              | -3.879290               | 3.042293  | 0.942418  |  |
| 19               | 6                | 0              | -4.865388               | -1.641782 | -1.304620 |  |
| 20               | 6                | 0              | -6.184780               | -1.804457 | -1.167840 |  |
| 21               | 8                | 0              | -1.876217               | 2.091468  | 0.650743  |  |
| 22               | 1                | 0              | 1.472007                | -2.328682 | 2.632405  |  |

|                                              |   |   |           |           |             |  |
|----------------------------------------------|---|---|-----------|-----------|-------------|--|
| 23                                           | 1 | 0 | 0.058488  | -0.609922 | 1.821582    |  |
| 24                                           | 1 | 0 | -0.330849 | 1.231860  | 0.484286    |  |
| 25                                           | 1 | 0 | 0.087655  | 2.918146  | -0.997583   |  |
| 26                                           | 1 | 0 | 1.811853  | 3.389278  | -1.042695   |  |
| 27                                           | 1 | 0 | 1.177309  | 2.346680  | -2.295578   |  |
| 28                                           | 1 | 0 | 4.657344  | -1.788329 | 0.825861    |  |
| 29                                           | 1 | 0 | 2.612450  | -2.969584 | 1.451748    |  |
| 30                                           | 1 | 0 | 3.180335  | -1.906653 | 2.751277    |  |
| 31                                           | 1 | 0 | -4.449526 | -1.434829 | -2.293769   |  |
| 32                                           | 1 | 0 | -2.299913 | -0.669398 | 0.792198    |  |
| 33                                           | 1 | 0 | -2.490922 | -0.242812 | -0.908213   |  |
| 34                                           | 1 | 0 | -2.405561 | -2.756084 | -1.272370   |  |
| 35                                           | 1 | 0 | -4.477526 | 0.536940  | 1.315506    |  |
| 36                                           | 1 | 0 | -4.643353 | 0.976288  | -0.361112   |  |
| 37                                           | 1 | 0 | -3.317111 | 3.817462  | 1.117883    |  |
| 38                                           | 1 | 0 | 7.418233  | -0.241804 | -0.440038   |  |
| 39                                           | 1 | 0 | 6.804377  | -1.866240 | -0.030559   |  |
| 40                                           | 1 | 0 | 6.855872  | -1.327213 | -1.730691   |  |
| 41                                           | 1 | 0 | 5.032925  | 0.364356  | -1.130352   |  |
| 42                                           | 1 | 0 | -6.635837 | -2.020576 | -0.201496   |  |
| 43                                           | 1 | 0 | -6.860027 | -1.735467 | -2.015271   |  |
| 44                                           | 1 | 0 | -4.390954 | -1.977253 | 0.746394    |  |
| 45                                           | 1 | 0 | -3.381254 | -3.751565 | -0.424829   |  |
| -----                                        |   |   |           |           |             |  |
| Sum of electronic and zero-point Energies=   |   |   |           |           | -975.475433 |  |
| Sum of electronic and thermal Energies=      |   |   |           |           | -975.451819 |  |
| Sum of electronic and thermal Enthalpies=    |   |   |           |           | -975.450875 |  |
| Sum of electronic and thermal Free Energies= |   |   |           |           | -975.531316 |  |

**Table 4: Cartesian coordinates and energies for the structure '00TS01'**

Standard orientation:

| -----  |        |        |                         |           |           |  |
|--------|--------|--------|-------------------------|-----------|-----------|--|
| Center | Atomic | Atomic | Coordinates (Angstroms) |           |           |  |
| Number | Number | Type   | X                       | Y         | Z         |  |
| -----  |        |        |                         |           |           |  |
| 1      | 6      | 0      | -1.586704               | -0.398163 | 0.458857  |  |
| 2      | 6      | 0      | -1.275865               | -1.167205 | 1.596935  |  |
| 3      | 6      | 0      | -0.976362               | -2.509341 | 1.412539  |  |
| 4      | 7      | 0      | -0.991684               | -3.033024 | 0.155951  |  |
| 5      | 6      | 0      | -1.282493               | -2.365698 | -0.968516 |  |
| 6      | 6      | 0      | -1.611696               | -0.962287 | -0.865509 |  |
| 7      | 6      | 0      | -1.267255               | -0.603857 | 2.999822  |  |
| 8      | 6      | 0      | -1.259121               | -3.056982 | -2.287795 |  |
| 9      | 8      | 0      | -1.871173               | -0.275453 | -1.899701 |  |
| 10     | 6      | 0      | -1.917045               | 1.045287  | 0.567859  |  |
| 11     | 7      | 0      | -3.055441               | 1.471976  | -0.005597 |  |
| 12     | 6      | 0      | -3.624211               | 2.797870  | 0.214722  |  |
| 13     | 7      | 0      | -0.467133               | 1.870962  | -0.480932 |  |
| 14     | 6      | 0      | 0.979602                | 1.927997  | -0.078849 |  |

|    |   |   |           |           |           |
|----|---|---|-----------|-----------|-----------|
| 15 | 6 | 0 | 1.627466  | 0.559877  | -0.337364 |
| 16 | 6 | 0 | 3.072501  | 0.457037  | 0.155032  |
| 17 | 6 | 0 | 3.560161  | -0.979143 | 0.148787  |
| 18 | 8 | 0 | 4.898719  | -1.048650 | 0.279874  |
| 19 | 6 | 0 | 1.660561  | 3.059006  | -0.811867 |
| 20 | 6 | 0 | 2.113465  | 4.170726  | -0.225405 |
| 21 | 8 | 0 | 2.849511  | -1.961947 | 0.060254  |
| 22 | 1 | 0 | -1.007498 | -1.375529 | 3.727452  |
| 23 | 1 | 0 | -0.722024 | -3.187335 | 2.215084  |
| 24 | 1 | 0 | -0.746063 | -4.014877 | 0.060987  |
| 25 | 1 | 0 | -0.987428 | -4.112180 | -2.196908 |
| 26 | 1 | 0 | -2.239031 | -2.977428 | -2.770252 |
| 27 | 1 | 0 | -0.548170 | -2.560559 | -2.956732 |
| 28 | 1 | 0 | -1.673458 | 1.539821  | 1.504266  |
| 29 | 1 | 0 | -0.536031 | 0.204748  | 3.108983  |
| 30 | 1 | 0 | -2.249200 | -0.206544 | 3.277179  |
| 31 | 1 | 0 | 1.768993  | 2.927912  | -1.889475 |
| 32 | 1 | 0 | 1.039549  | -0.216346 | 0.154690  |
| 33 | 1 | 0 | 1.591994  | 0.344171  | -1.413079 |
| 34 | 1 | 0 | -0.620757 | 1.353850  | -1.356608 |
| 35 | 1 | 0 | 3.165638  | 0.816431  | 1.189429  |
| 36 | 1 | 0 | 3.762129  | 1.068339  | -0.434408 |
| 37 | 1 | 0 | 5.156125  | -1.987112 | 0.295625  |
| 38 | 1 | 0 | -4.710855 | 2.742450  | 0.123049  |
| 39 | 1 | 0 | -3.381352 | 3.138035  | 1.224567  |
| 40 | 1 | 0 | -3.256019 | 3.535481  | -0.509896 |
| 41 | 1 | 0 | -3.308662 | 0.983782  | -0.862576 |
| 42 | 1 | 0 | 2.030894  | 4.328285  | 0.847953  |
| 43 | 1 | 0 | 2.594347  | 4.957944  | -0.797518 |
| 44 | 1 | 0 | 0.995979  | 2.145882  | 0.997511  |
| 45 | 1 | 0 | -0.813761 | 2.819048  | -0.624192 |

-----  
 Sum of electronic and zero-point Energies= -975.442160  
 Sum of electronic and thermal Energies= -975.418965  
 Sum of electronic and thermal Enthalpies= -975.418020  
 Sum of electronic and thermal Free Energies= -975.497125

**Table 5: Cartesian coordinates and energies for the structure '01'**

Standard orientation:

| Center<br>Number | Atomic<br>Number | Atomic<br>Type | Coordinates (Angstroms) |           |           |
|------------------|------------------|----------------|-------------------------|-----------|-----------|
|                  |                  |                | X                       | Y         | Z         |
| 1                | 6                | 0              | 1.579938                | 0.128090  | -0.270839 |
| 2                | 6                | 0              | 2.189531                | -0.558177 | -1.339501 |
| 3                | 6                | 0              | 2.834321                | -1.756526 | -1.068277 |
| 4                | 7                | 0              | 2.862956                | -2.230123 | 0.203753  |
| 5                | 6                | 0              | 2.303175                | -1.631487 | 1.267984  |
| 6                | 6                | 0              | 1.627156                | -0.387005 | 1.061777  |

|                                              |   |   |           |             |           |
|----------------------------------------------|---|---|-----------|-------------|-----------|
| 7                                            | 6 | 0 | 2.170470  | -0.040986   | -2.757193 |
| 8                                            | 6 | 0 | 2.395709  | -2.252268   | 2.620450  |
| 9                                            | 8 | 0 | 1.081802  | 0.208153    | 2.072950  |
| 10                                           | 6 | 0 | 0.905904  | 1.472615    | -0.525749 |
| 11                                           | 7 | 0 | 1.878013  | 2.513506    | -0.588893 |
| 12                                           | 6 | 0 | 1.456401  | 3.842476    | -1.029876 |
| 13                                           | 7 | 0 | -0.174529 | 1.721810    | 0.562308  |
| 14                                           | 6 | 0 | -1.611969 | 1.366853    | 0.233844  |
| 15                                           | 6 | 0 | -1.747025 | -0.153906   | 0.063103  |
| 16                                           | 6 | 0 | -3.151891 | -0.583733   | -0.365783 |
| 17                                           | 6 | 0 | -3.199252 | -2.061854   | -0.700479 |
| 18                                           | 8 | 0 | -4.462817 | -2.479273   | -0.913135 |
| 19                                           | 6 | 0 | -2.480576 | 1.927077    | 1.332022  |
| 20                                           | 6 | 0 | -3.352537 | 2.923811    | 1.158955  |
| 21                                           | 8 | 0 | -2.232430 | -2.792103   | -0.783887 |
| 22                                           | 1 | 0 | 2.763749  | -0.679100   | -3.415313 |
| 23                                           | 1 | 0 | 3.331354  | -2.355242   | -1.819349 |
| 24                                           | 1 | 0 | 3.342393  | -3.111504   | 0.365268  |
| 25                                           | 1 | 0 | 2.927579  | -3.207366   | 2.598998  |
| 26                                           | 1 | 0 | 2.905139  | -1.574728   | 3.313657  |
| 27                                           | 1 | 0 | 1.391739  | -2.411418   | 3.027345  |
| 28                                           | 1 | 0 | 0.358889  | 1.456797    | -1.475538 |
| 29                                           | 1 | 0 | 1.150231  | -0.017982   | -3.157844 |
| 30                                           | 1 | 0 | 2.574297  | 0.974124    | -2.805885 |
| 31                                           | 1 | 0 | -2.366696 | 1.463223    | 2.312131  |
| 32                                           | 1 | 0 | -1.034662 | -0.512853   | -0.685098 |
| 33                                           | 1 | 0 | -1.481819 | -0.647795   | 1.004371  |
| 34                                           | 1 | 0 | 0.248521  | 1.130111    | 1.439572  |
| 35                                           | 1 | 0 | -3.484547 | -0.037661   | -1.258800 |
| 36                                           | 1 | 0 | -3.901147 | -0.376359   | 0.404853  |
| 37                                           | 1 | 0 | -4.436877 | -3.425672   | -1.138519 |
| 38                                           | 1 | 0 | 2.340276  | 4.475329    | -1.130905 |
| 39                                           | 1 | 0 | 0.985082  | 3.765683    | -2.015072 |
| 40                                           | 1 | 0 | 0.755296  | 4.355986    | -0.351702 |
| 41                                           | 1 | 0 | 2.517596  | 2.520280    | 0.198542  |
| 42                                           | 1 | 0 | -3.499521 | 3.399329    | 0.191554  |
| 43                                           | 1 | 0 | -3.961217 | 3.290647    | 1.979384  |
| 44                                           | 1 | 0 | -1.852389 | 1.871217    | -0.711617 |
| 45                                           | 1 | 0 | -0.146909 | 2.714499    | 0.799741  |
| -----                                        |   |   |           |             |           |
| Sum of electronic and zero-point Energies=   |   |   |           | -975.452573 |           |
| Sum of electronic and thermal Energies=      |   |   |           | -975.429599 |           |
| Sum of electronic and thermal Enthalpies=    |   |   |           | -975.428654 |           |
| Sum of electronic and thermal Free Energies= |   |   |           | -975.506924 |           |

**Table 6: Cartesian coordinates and energies for the structure '01TS02'**

Standard orientation:

-----

| Center | Atomic | Atomic | Coordinates (Angstroms) |
|--------|--------|--------|-------------------------|
|--------|--------|--------|-------------------------|

| Number                                       | Number | Type | X         | Y           | Z         |
|----------------------------------------------|--------|------|-----------|-------------|-----------|
| 1                                            | 6      | 0    | -1.469064 | -1.341317   | 1.125832  |
| 2                                            | 6      | 0    | -2.258156 | -2.381491   | 0.647863  |
| 3                                            | 7      | 0    | -3.020548 | -2.193466   | -0.463129 |
| 4                                            | 6      | 0    | -3.101307 | -1.060017   | -1.177345 |
| 5                                            | 6      | 0    | -2.315490 | 0.068206    | -0.745084 |
| 6                                            | 6      | 0    | -1.498343 | -0.121794   | 0.423995  |
| 7                                            | 6      | 0    | -3.980797 | -0.979105   | -2.377795 |
| 8                                            | 8      | 0    | -2.346575 | 1.174496    | -1.370188 |
| 9                                            | 6      | 0    | -0.697322 | 1.083868    | 0.831950  |
| 10                                           | 7      | 0    | 0.188835  | 1.717183    | -0.216341 |
| 11                                           | 6      | 0    | 1.661193  | 1.460825    | -0.214703 |
| 12                                           | 6      | 0    | 2.295504  | 2.362619    | -1.244314 |
| 13                                           | 6      | 0    | 3.158074  | 3.340024    | -0.959356 |
| 14                                           | 6      | 0    | -0.617408 | -1.590080   | 2.350703  |
| 15                                           | 6      | 0    | 1.958099  | -0.031064   | -0.449615 |
| 16                                           | 6      | 0    | 3.437219  | -0.396437   | -0.283632 |
| 17                                           | 6      | 0    | 3.617709  | -1.876443   | -0.001302 |
| 18                                           | 8      | 0    | 2.763366  | -2.607089   | 0.461963  |
| 19                                           | 8      | 0    | 4.863903  | -2.292583   | -0.292939 |
| 20                                           | 7      | 0    | -1.488825 | 2.352363    | 1.054795  |
| 21                                           | 6      | 0    | -1.892888 | 2.716149    | 2.425178  |
| 22                                           | 1      | 0    | -0.751621 | -0.813564   | 3.110153  |
| 23                                           | 1      | 0    | -2.307023 | -3.359010   | 1.107202  |
| 24                                           | 1      | 0    | -3.580508 | -2.980725   | -0.779291 |
| 25                                           | 1      | 0    | -3.388006 | -0.718067   | -3.260954 |
| 26                                           | 1      | 0    | -4.510121 | -1.917173   | -2.567031 |
| 27                                           | 1      | 0    | -4.712423 | -0.173650   | -2.253512 |
| 28                                           | 1      | 0    | -0.091564 | 0.907749    | 1.721590  |
| 29                                           | 1      | 0    | -0.878888 | -2.543959   | 2.813642  |
| 30                                           | 1      | 0    | 0.446292  | -1.641335   | 2.092529  |
| 31                                           | 1      | 0    | 2.025382  | 2.162053    | -2.282174 |
| 32                                           | 1      | 0    | 1.381710  | -0.632508   | 0.257939  |
| 33                                           | 1      | 0    | 1.613586  | -0.317235   | -1.451637 |
| 34                                           | 1      | 0    | -0.246179 | 1.572847    | -1.135668 |
| 35                                           | 1      | 0    | 3.875934  | 0.133012    | 0.574118  |
| 36                                           | 1      | 0    | 4.041001  | -0.114286   | -1.149753 |
| 37                                           | 1      | 0    | 4.935593  | -3.233256   | -0.052834 |
| 38                                           | 1      | 0    | -2.574626 | 1.973604    | 2.852088  |
| 39                                           | 1      | 0    | -1.006410 | 2.804507    | 3.057506  |
| 40                                           | 1      | 0    | -2.397882 | 3.683066    | 2.392374  |
| 41                                           | 1      | 0    | -2.273609 | 2.345903    | 0.391665  |
| 42                                           | 1      | 0    | 3.457769  | 3.563539    | 0.062083  |
| 43                                           | 1      | 0    | 3.601471  | 3.948348    | -1.741239 |
| 44                                           | 1      | 0    | 2.020557  | 1.749546    | 0.781527  |
| 45                                           | 1      | 0    | -0.464354 | 2.745793    | 0.327460  |
| Sum of electronic and zero-point Energies=   |        |      |           | -975.413880 |           |
| Sum of electronic and thermal Energies=      |        |      |           | -975.391086 |           |
| Sum of electronic and thermal Enthalpies=    |        |      |           | -975.390142 |           |
| Sum of electronic and thermal Free Energies= |        |      |           | -975.468506 |           |



**Table 7: Cartesian coordinates and energies for the structure '01TS02\_H2O'**

Standard orientation:

| Center<br>Number | Atomic<br>Number | Atomic<br>Type | Coordinates (Angstroms) |           |           |
|------------------|------------------|----------------|-------------------------|-----------|-----------|
|                  |                  |                | X                       | Y         | Z         |
| 1                | 6                | 0              | -1.142357               | -1.416445 | 1.331391  |
| 2                | 6                | 0              | -1.456080               | -2.718651 | 0.959668  |
| 3                | 7                | 0              | -1.939071               | -2.962778 | -0.287395 |
| 4                | 6                | 0              | -2.165901               | -2.039368 | -1.236024 |
| 5                | 6                | 0              | -1.872931               | -0.664716 | -0.924288 |
| 6                | 6                | 0              | -1.335438               | -0.397795 | 0.382334  |
| 7                | 6                | 0              | -2.707940               | -2.436829 | -2.566416 |
| 8                | 8                | 0              | -2.079514               | 0.265197  | -1.770498 |
| 9                | 6                | 0              | -1.032101               | 1.064404  | 0.644757  |
| 10               | 7                | 0              | -0.101216               | 1.689461  | -0.356469 |
| 11               | 6                | 0              | 1.383802                | 1.522178  | -0.158887 |
| 12               | 6                | 0              | 2.069994                | 2.413344  | -1.168230 |
| 13               | 6                | 0              | 2.786724                | 3.495334  | -0.857344 |
| 14               | 6                | 0              | -0.596074               | -1.172939 | 2.720352  |
| 15               | 6                | 0              | 1.836971                | 0.057121  | -0.274269 |
| 16               | 6                | 0              | 3.331663                | -0.138170 | -0.001659 |
| 17               | 6                | 0              | 3.675332                | -1.601677 | 0.198002  |
| 18               | 8                | 0              | 2.872744                | -2.485851 | 0.424749  |
| 19               | 8                | 0              | 5.003344                | -1.814654 | 0.119218  |
| 20               | 7                | 0              | -2.296598               | 1.885988  | 0.587136  |
| 21               | 6                | 0              | -3.184690               | 1.731923  | 1.761739  |
| 22               | 1                | 0              | -1.216018               | -0.468435 | 3.284252  |
| 23               | 1                | 0              | -1.327382               | -3.576693 | 1.604719  |
| 24               | 1                | 0              | -2.145251               | -3.929700 | -0.523361 |
| 25               | 1                | 0              | -2.029022               | -2.109908 | -3.360985 |
| 26               | 1                | 0              | -2.857875               | -3.517159 | -2.646132 |
| 27               | 1                | 0              | -3.660509               | -1.928900 | -2.751743 |
| 28               | 1                | 0              | -0.594424               | 1.221975  | 1.632756  |
| 29               | 1                | 0              | -0.557304               | -2.103347 | 3.290380  |
| 30               | 1                | 0              | 0.422853                | -0.772190 | 2.688359  |
| 31               | 1                | 0              | 1.967939                | 2.111659  | -2.211941 |
| 32               | 1                | 0              | 1.280472                | -0.566079 | 0.427073  |
| 33               | 1                | 0              | 1.593446                | -0.317817 | -1.276662 |
| 34               | 1                | 0              | -0.402504               | 1.349553  | -1.280483 |
| 35               | 1                | 0              | 3.636823                | 0.384378  | 0.915939  |
| 36               | 1                | 0              | 3.961073                | 0.270204  | -0.797239 |
| 37               | 1                | 0              | 5.170590                | -2.758990 | 0.285104  |
| 38               | 1                | 0              | -3.461724               | 0.686661  | 1.926411  |
| 39               | 1                | 0              | -2.681162               | 2.124603  | 2.648361  |
| 40               | 1                | 0              | -4.090403               | 2.315706  | 1.588898  |
| 41               | 1                | 0              | -2.772220               | 1.593817  | -0.276819 |
| 42               | 1                | 0              | 2.917411                | 3.823063  | 0.171374  |
| 43               | 1                | 0              | 3.273600                | 4.089608  | -1.624310 |
| 44               | 1                | 0              | 1.596505                | 1.899445  | 0.849426  |

|                                              |   |   |           |              |           |
|----------------------------------------------|---|---|-----------|--------------|-----------|
| 45                                           | 1 | 0 | -0.397840 | 2.964859     | -0.266614 |
| 46                                           | 1 | 0 | -1.224564 | 4.605811     | -0.498410 |
| 47                                           | 1 | 0 | -1.862983 | 3.099885     | 0.395822  |
| 48                                           | 8 | 0 | -1.012470 | 3.914434     | 0.143552  |
| -----                                        |   |   |           |              |           |
| Sum of electronic and zero-point Energies=   |   |   |           | -1051.857920 |           |
| Sum of electronic and thermal Energies=      |   |   |           | -1051.833453 |           |
| Sum of electronic and thermal Enthalpies=    |   |   |           | -1051.832509 |           |
| Sum of electronic and thermal Free Energies= |   |   |           | -1051.914276 |           |

**Table 8: Cartesian coordinates and energies for the structure '02a'**

Standard orientation:

| Center<br>Number | Atomic<br>Number | Atomic<br>Type | Coordinates (Angstroms) |           |           |
|------------------|------------------|----------------|-------------------------|-----------|-----------|
|                  |                  |                | X                       | Y         | Z         |
| 1                | 6                | 0              | -1.462282               | -0.052393 | 0.420845  |
| 2                | 6                | 0              | -1.140483               | -1.197028 | 1.174506  |
| 3                | 6                | 0              | -1.742514               | -2.398602 | 0.818322  |
| 4                | 7                | 0              | -2.618975               | -2.432876 | -0.218086 |
| 5                | 6                | 0              | -3.005383               | -1.373312 | -0.950703 |
| 6                | 6                | 0              | -2.435272               | -0.098004 | -0.633773 |
| 7                | 6                | 0              | -0.172470               | -1.196528 | 2.336078  |
| 8                | 6                | 0              | -3.995146               | -1.534994 | -2.054215 |
| 9                | 8                | 0              | -2.796521               | 0.954277  | -1.279309 |
| 10               | 6                | 0              | -0.776491               | 1.294580  | 0.621460  |
| 11               | 7                | 0              | -1.874830               | 2.371214  | 0.625144  |
| 12               | 6                | 0              | -2.741736               | 2.450424  | 1.830363  |
| 13               | 7                | 0              | 0.139602                | 1.706764  | -0.411453 |
| 14               | 6                | 0              | 1.597570                | 1.503130  | -0.232406 |
| 15               | 6                | 0              | 2.034710                | 0.072391  | -0.613744 |
| 16               | 6                | 0              | 3.493356                | -0.255470 | -0.265611 |
| 17               | 6                | 0              | 3.702260                | -1.740860 | -0.040706 |
| 18               | 8                | 0              | 4.974558                | -2.113280 | -0.276894 |
| 19               | 6                | 0              | 2.333489                | 2.555971  | -1.027664 |
| 20               | 6                | 0              | 3.173815                | 3.452706  | -0.507717 |
| 21               | 8                | 0              | 2.846547                | -2.515814 | 0.343549  |
| 22               | 1                | 0              | -0.390674               | -0.393892 | 3.047436  |
| 23               | 1                | 0              | -1.548206               | -3.337339 | 1.318895  |
| 24               | 1                | 0              | -3.024635               | -3.333902 | -0.455876 |
| 25               | 1                | 0              | -3.558721               | -1.208838 | -3.004186 |
| 26               | 1                | 0              | -4.334527               | -2.569600 | -2.155125 |
| 27               | 1                | 0              | -4.861765               | -0.889237 | -1.877933 |
| 28               | 1                | 0              | -0.267326               | 1.348926  | 1.585828  |
| 29               | 1                | 0              | -0.227344               | -2.140503 | 2.882085  |
| 30               | 1                | 0              | 0.862079                | -1.085402 | 1.996692  |
| 31               | 1                | 0              | 2.156415                | 2.542731  | -2.104234 |
| 32               | 1                | 0              | 1.390371                | -0.646689 | -0.102557 |
| 33               | 1                | 0              | 1.869594                | -0.075690 | -1.689294 |

|                                              |   |   |           |             |           |
|----------------------------------------------|---|---|-----------|-------------|-----------|
| 34                                           | 1 | 0 | -0.179900 | 1.429065    | -1.336713 |
| 35                                           | 1 | 0 | 3.785034  | 0.232370    | 0.675870  |
| 36                                           | 1 | 0 | 4.199006  | 0.104171    | -1.017792 |
| 37                                           | 1 | 0 | 5.056753  | -3.061075   | -0.070733 |
| 38                                           | 1 | 0 | -3.242242 | 1.492285    | 1.972493  |
| 39                                           | 1 | 0 | -2.138887 | 2.690054    | 2.708839  |
| 40                                           | 1 | 0 | -3.491425 | 3.227181    | 1.674005  |
| 41                                           | 1 | 0 | -2.431875 | 2.070891    | -0.260356 |
| 42                                           | 1 | 0 | 3.381206  | 3.495029    | 0.559493  |
| 43                                           | 1 | 0 | 3.688823  | 4.176251    | -1.131870 |
| 44                                           | 1 | 0 | 1.808387  | 1.668027    | 0.832716  |
| 45                                           | 1 | 0 | -1.397911 | 3.255931    | 0.434099  |
| -----                                        |   |   |           |             |           |
| Sum of electronic and zero-point Energies=   |   |   |           | -975.446682 |           |
| Sum of electronic and thermal Energies=      |   |   |           | -975.424562 |           |
| Sum of electronic and thermal Enthalpies=    |   |   |           | -975.423618 |           |
| Sum of electronic and thermal Free Energies= |   |   |           | -975.499345 |           |

**Table 9: Cartesian coordinates and energies for the structure '02b'**

Standard orientation:

| -----            |                  |                |                         |           |           |  |
|------------------|------------------|----------------|-------------------------|-----------|-----------|--|
| Center<br>Number | Atomic<br>Number | Atomic<br>Type | Coordinates (Angstroms) |           |           |  |
|                  |                  |                | X                       | Y         | Z         |  |
| -----            |                  |                |                         |           |           |  |
| 1                | 6                | 0              | -1.977832               | -0.182180 | 0.427460  |  |
| 2                | 6                | 0              | -2.251781               | -1.241769 | 1.312757  |  |
| 3                | 6                | 0              | -3.342024               | -2.058111 | 1.044438  |  |
| 4                | 7                | 0              | -4.103308               | -1.817714 | -0.055136 |  |
| 5                | 6                | 0              | -3.901918               | -0.829610 | -0.941599 |  |
| 6                | 6                | 0              | -2.788827               | 0.053023  | -0.731779 |  |
| 7                | 6                | 0              | -1.395287               | -1.536508 | 2.520798  |  |
| 8                | 6                | 0              | -4.804273               | -0.673895 | -2.118117 |  |
| 9                | 8                | 0              | -2.567104               | 1.001205  | -1.572429 |  |
| 10               | 6                | 0              | -0.742307               | 0.687594  | 0.625298  |  |
| 11               | 7                | 0              | -1.084370               | 2.120753  | 0.123082  |  |
| 12               | 6                | 0              | -1.879765               | 2.952688  | 1.063432  |  |
| 13               | 7                | 0              | 0.380966                | 0.113004  | -0.027849 |  |
| 14               | 6                | 0              | 1.749274                | 0.618154  | 0.208565  |  |
| 15               | 6                | 0              | 2.734053                | -0.464056 | -0.274462 |  |
| 16               | 6                | 0              | 4.195601                | -0.162603 | 0.060966  |  |
| 17               | 6                | 0              | 5.124320                | -1.258191 | -0.422704 |  |
| 18               | 8                | 0              | 6.406178                | -1.003686 | -0.078371 |  |
| 19               | 6                | 0              | 2.015210                | 1.958456  | -0.451995 |  |
| 20               | 6                | 0              | 2.341568                | 3.085908  | 0.191961  |  |
| 21               | 8                | 0              | 4.786394                | -2.243866 | -1.042654 |  |
| 22               | 1                | 0              | -1.424073               | -0.713453 | 3.243832  |  |
| 23               | 1                | 0              | -3.631174               | -2.899233 | 1.659640  |  |
| 24               | 1                | 0              | -4.889614               | -2.438985 | -0.224681 |  |
| 25               | 1                | 0              | -4.232734               | -0.773471 | -3.047113 |  |

|                                              |   |   |           |             |           |
|----------------------------------------------|---|---|-----------|-------------|-----------|
| 26                                           | 1 | 0 | -5.613485 | -1.409328   | -2.116367 |
| 27                                           | 1 | 0 | -5.233488 | 0.333303    | -2.130110 |
| 28                                           | 1 | 0 | -0.508239 | 0.812104    | 1.687742  |
| 29                                           | 1 | 0 | -1.740493 | -2.435405   | 3.035541  |
| 30                                           | 1 | 0 | -0.352286 | -1.692865   | 2.229310  |
| 31                                           | 1 | 0 | 1.949171  | 1.962860    | -1.542338 |
| 32                                           | 1 | 0 | 2.440875  | -1.417107   | 0.175668  |
| 33                                           | 1 | 0 | 2.630236  | -0.592350   | -1.359293 |
| 34                                           | 1 | 0 | 0.203507  | -0.182438   | -0.982762 |
| 35                                           | 1 | 0 | 4.345580  | -0.049753   | 1.142172  |
| 36                                           | 1 | 0 | 4.533707  | 0.779871    | -0.385355 |
| 37                                           | 1 | 0 | 6.956432  | -1.731434   | -0.416670 |
| 38                                           | 1 | 0 | -2.828230 | 2.454141    | 1.267377  |
| 39                                           | 1 | 0 | -1.330018 | 3.096979    | 1.996453  |
| 40                                           | 1 | 0 | -2.077988 | 3.920637    | 0.600697  |
| 41                                           | 1 | 0 | -1.660821 | 1.897820    | -0.782633 |
| 42                                           | 1 | 0 | 2.448708  | 3.115109    | 1.274990  |
| 43                                           | 1 | 0 | 2.544902  | 4.009594    | -0.342060 |
| 44                                           | 1 | 0 | 1.854739  | 0.735435    | 1.296568  |
| 45                                           | 1 | 0 | -0.198041 | 2.583026    | -0.103770 |
| -----                                        |   |   |           |             |           |
| Sum of electronic and zero-point Energies=   |   |   |           | -975.453770 |           |
| Sum of electronic and thermal Energies=      |   |   |           | -975.430851 |           |
| Sum of electronic and thermal Enthalpies=    |   |   |           | -975.429907 |           |
| Sum of electronic and thermal Free Energies= |   |   |           | -975.508069 |           |

**Table 10: Cartesian coordinates and energies for the structure '02TS03'**

Standard orientation:

| -----            |                  |                |                         |           |           |  |
|------------------|------------------|----------------|-------------------------|-----------|-----------|--|
| Center<br>Number | Atomic<br>Number | Atomic<br>Type | Coordinates (Angstroms) |           |           |  |
|                  |                  |                | X                       | Y         | Z         |  |
| -----            |                  |                |                         |           |           |  |
| 1                | 6                | 0              | -1.943508               | -0.062117 | 0.457639  |  |
| 2                | 6                | 0              | -2.756514               | -0.133562 | 1.607349  |  |
| 3                | 6                | 0              | -3.907146               | -0.906910 | 1.547546  |  |
| 4                | 7                | 0              | -4.217409               | -1.561403 | 0.392477  |  |
| 5                | 6                | 0              | -3.505843               | -1.528790 | -0.741575 |  |
| 6                | 6                | 0              | -2.289337               | -0.744042 | -0.766263 |  |
| 7                | 6                | 0              | -2.418596               | 0.563377  | 2.906087  |  |
| 8                | 6                | 0              | -3.948617               | -2.295753 | -1.939322 |  |
| 9                | 8                | 0              | -1.592081               | -0.670775 | -1.819225 |  |
| 10               | 6                | 0              | -0.678641               | 0.705294  | 0.455660  |  |
| 11               | 7                | 0              | -1.235498               | 2.224662  | -0.766550 |  |
| 12               | 6                | 0              | -2.330863               | 3.128511  | -0.379537 |  |
| 13               | 7                | 0              | 0.406316                | 0.164522  | -0.108147 |  |
| 14               | 6                | 0              | 1.776904                | 0.693888  | 0.040353  |  |
| 15               | 6                | 0              | 2.751169                | -0.499965 | -0.007128 |  |
| 16               | 6                | 0              | 4.200226                | -0.112208 | 0.291277  |  |
| 17               | 6                | 0              | 5.121162                | -1.316023 | 0.268579  |  |

|                                              |   |   |           |             |           |
|----------------------------------------------|---|---|-----------|-------------|-----------|
| 18                                           | 8 | 0 | 6.397742  | -0.962110   | 0.533540  |
| 19                                           | 6 | 0 | 2.077677  | 1.734966    | -1.017845 |
| 20                                           | 6 | 0 | 2.419502  | 3.001823    | -0.761351 |
| 21                                           | 8 | 0 | 4.779493  | -2.457334   | 0.044470  |
| 22                                           | 1 | 0 | -2.341813 | 1.648335    | 2.777931  |
| 23                                           | 1 | 0 | -4.588288 | -1.041709   | 2.376140  |
| 24                                           | 1 | 0 | -5.062154 | -2.127230   | 0.393460  |
| 25                                           | 1 | 0 | -3.177677 | -3.019396   | -2.225500 |
| 26                                           | 1 | 0 | -4.890581 | -2.824171   | -1.768456 |
| 27                                           | 1 | 0 | -4.063341 | -1.621279   | -2.794373 |
| 28                                           | 1 | 0 | -0.479095 | 1.342978    | 1.311733  |
| 29                                           | 1 | 0 | -3.189246 | 0.379662    | 3.657569  |
| 30                                           | 1 | 0 | -1.468278 | 0.205712    | 3.316129  |
| 31                                           | 1 | 0 | 2.030049  | 1.383464    | -2.049744 |
| 32                                           | 1 | 0 | 2.415733  | -1.251001   | 0.714851  |
| 33                                           | 1 | 0 | 2.695414  | -0.975448   | -0.993893 |
| 34                                           | 1 | 0 | 0.211813  | -0.458691   | -0.894323 |
| 35                                           | 1 | 0 | 4.295543  | 0.361041    | 1.277022  |
| 36                                           | 1 | 0 | 4.585573  | 0.619098    | -0.428147 |
| 37                                           | 1 | 0 | 6.943606  | -1.767194   | 0.504976  |
| 38                                           | 1 | 0 | -3.209561 | 2.535698    | -0.115167 |
| 39                                           | 1 | 0 | -2.027400 | 3.718361    | 0.488747  |
| 40                                           | 1 | 0 | -2.602468 | 3.813383    | -1.189803 |
| 41                                           | 1 | 0 | -1.458961 | 1.665098    | -1.592604 |
| 42                                           | 1 | 0 | 2.502545  | 3.379353    | 0.256053  |
| 43                                           | 1 | 0 | 2.657777  | 3.698255    | -1.559795 |
| 44                                           | 1 | 0 | 1.828763  | 1.165066    | 1.030306  |
| 45                                           | 1 | 0 | -0.368493 | 2.726979    | -0.956679 |
| -----                                        |   |   |           |             |           |
| Sum of electronic and zero-point Energies=   |   |   |           | -975.443804 |           |
| Sum of electronic and thermal Energies=      |   |   |           | -975.420413 |           |
| Sum of electronic and thermal Enthalpies=    |   |   |           | -975.419469 |           |
| Sum of electronic and thermal Free Energies= |   |   |           | -975.499215 |           |

**Table 11: Cartesian coordinates and energies for the structure '03a'**

Standard orientation:

| -----            |                  |                |                         |           |           |  |
|------------------|------------------|----------------|-------------------------|-----------|-----------|--|
| Center<br>Number | Atomic<br>Number | Atomic<br>Type | Coordinates (Angstroms) |           |           |  |
|                  |                  |                | X                       | Y         | Z         |  |
| -----            |                  |                |                         |           |           |  |
| 1                | 6                | 0              | 4.363170                | 0.648563  | -1.018212 |  |
| 2                | 7                | 0              | 4.627438                | -0.540456 | -0.381678 |  |
| 3                | 6                | 0              | 3.753029                | -1.273387 | 0.301643  |  |
| 4                | 6                | 0              | 2.380555                | -0.788010 | 0.396574  |  |
| 5                | 6                | 0              | 2.083267                | 0.464741  | -0.272678 |  |
| 6                | 6                | 0              | 3.094324                | 1.179740  | -0.981936 |  |
| 7                | 6                | 0              | 4.157881                | -2.549799 | 0.948808  |  |
| 8                | 8                | 0              | 1.534898                | -1.463133 | 1.038410  |  |
| 9                | 6                | 0              | 0.741936                | 0.963483  | -0.207192 |  |

|    |   |   |           |           |           |
|----|---|---|-----------|-----------|-----------|
| 10 | 7 | 0 | -0.215589 | 0.342663  | 0.423787  |
| 11 | 6 | 0 | -1.620411 | 0.798414  | 0.527104  |
| 12 | 6 | 0 | -2.521349 | -0.272896 | -0.122630 |
| 13 | 6 | 0 | -3.991818 | 0.146877  | -0.177402 |
| 14 | 6 | 0 | -4.841927 | -0.892319 | -0.882475 |
| 15 | 8 | 0 | -6.143398 | -0.535066 | -0.892663 |
| 16 | 6 | 0 | 2.827486  | 2.486455  | -1.688921 |
| 17 | 6 | 0 | -1.941027 | 1.058060  | 1.981830  |
| 18 | 6 | 0 | -2.278364 | 2.254252  | 2.467407  |
| 19 | 8 | 0 | -4.425588 | -1.915478 | -1.381975 |
| 20 | 1 | 0 | 2.480578  | 3.255930  | -0.991086 |
| 21 | 1 | 0 | 5.197976  | 1.109512  | -1.527334 |
| 22 | 1 | 0 | 5.581058  | -0.890497 | -0.440399 |
| 23 | 1 | 0 | 5.214290  | -2.778740 | 0.787407  |
| 24 | 1 | 0 | 3.957402  | -2.500889 | 2.024546  |
| 25 | 1 | 0 | 3.545328  | -3.371892 | 0.563037  |
| 26 | 1 | 0 | 0.484191  | 1.898026  | -0.700125 |
| 27 | 1 | 0 | 3.735199  | 2.861859  | -2.165067 |
| 28 | 1 | 0 | 2.070158  | 2.371646  | -2.471700 |
| 29 | 1 | 0 | -1.903642 | 0.188792  | 2.638532  |
| 30 | 1 | 0 | -2.160902 | -0.475742 | -1.136271 |
| 31 | 1 | 0 | -2.426993 | -1.213411 | 0.432306  |
| 32 | 1 | 0 | 0.093400  | -0.544124 | 0.876486  |
| 33 | 1 | 0 | -4.120209 | 1.097604  | -0.710765 |
| 34 | 1 | 0 | -4.408434 | 0.307667  | 0.822818  |
| 35 | 1 | 0 | -6.642830 | -1.230277 | -1.355665 |
| 36 | 1 | 0 | -2.334578 | 3.138249  | 1.836115  |
| 37 | 1 | 0 | -2.523361 | 2.388227  | 3.516292  |
| 38 | 1 | 0 | -1.689377 | 1.736985  | -0.035583 |

-----  
 Sum of electronic and zero-point Energies= -879.642018  
 Sum of electronic and thermal Energies= -879.622156  
 Sum of electronic and thermal Enthalpies= -879.621212  
 Sum of electronic and thermal Free Energies= -879.693565  
 -----

**Table 12: Cartesian coordinates and energies for the structure '03TS04'**

Standard orientation:

| Center<br>Number | Atomic<br>Number | Atomic<br>Type | Coordinates (Angstroms) |           |           |
|------------------|------------------|----------------|-------------------------|-----------|-----------|
|                  |                  |                | X                       | Y         | Z         |
| 1                | 6                | 0              | 3.172179                | 4.353661  | 0.103295  |
| 2                | 7                | 0              | 2.793660                | 3.331351  | -0.898608 |
| 3                | 7                | 0              | -5.023722               | -0.452713 | 0.021318  |
| 4                | 6                | 0              | -4.184232               | -0.694085 | -0.987015 |
| 5                | 6                | 0              | -4.689235               | -1.174734 | -2.302220 |
| 6                | 6                | 0              | -2.762820               | -0.483414 | -0.766570 |
| 7                | 8                | 0              | -1.954041               | -0.706318 | -1.706838 |
| 8                | 6                | 0              | -2.368965               | -0.025951 | 0.554509  |

|                                              |   |   |           |             |           |
|----------------------------------------------|---|---|-----------|-------------|-----------|
| 9                                            | 6 | 0 | -0.970197 | 0.159867    | 0.823779  |
| 10                                           | 6 | 0 | -3.341673 | 0.205941    | 1.569183  |
| 11                                           | 6 | 0 | -2.976049 | 0.677538    | 2.956465  |
| 12                                           | 6 | 0 | -4.668680 | -0.016881   | 1.271668  |
| 13                                           | 8 | 0 | 3.799434  | -3.466041   | 0.045188  |
| 14                                           | 6 | 0 | 4.338278  | -2.404837   | 0.276468  |
| 15                                           | 8 | 0 | 5.662209  | -2.291917   | 0.535261  |
| 16                                           | 6 | 0 | 3.652999  | -1.055016   | 0.317771  |
| 17                                           | 6 | 0 | 2.158579  | -1.157627   | 0.012772  |
| 18                                           | 6 | 0 | 1.433214  | 0.196911    | 0.112468  |
| 19                                           | 7 | 0 | -0.032365 | -0.074999   | -0.052687 |
| 20                                           | 6 | 0 | 1.880126  | 1.203997    | -0.910591 |
| 21                                           | 6 | 0 | 1.421629  | 2.647550    | -0.786673 |
| 22                                           | 1 | 0 | -6.013659 | -0.608487   | -0.150109 |
| 23                                           | 1 | 0 | -4.392208 | -0.478329   | -3.093582 |
| 24                                           | 1 | 0 | -5.776497 | -1.288933   | -2.310918 |
| 25                                           | 1 | 0 | -4.222766 | -2.133869   | -2.551385 |
| 26                                           | 1 | 0 | -5.478241 | 0.127724    | 1.973363  |
| 27                                           | 1 | 0 | -2.456659 | 1.641430    | 2.929760  |
| 28                                           | 1 | 0 | -2.325909 | -0.041725   | 3.465972  |
| 29                                           | 1 | 0 | -3.869329 | 0.804208    | 3.571436  |
| 30                                           | 1 | 0 | 3.832684  | -0.623755   | 1.311434  |
| 31                                           | 1 | 0 | 4.158869  | -0.391643   | -0.390681 |
| 32                                           | 1 | 0 | 1.694421  | -1.869850   | 0.702891  |
| 33                                           | 1 | 0 | 2.018761  | -1.569298   | -0.993522 |
| 34                                           | 1 | 0 | 2.497511  | 5.213234    | 0.065379  |
| 35                                           | 1 | 0 | 3.126948  | 3.900381    | 1.096275  |
| 36                                           | 1 | 0 | 4.194122  | 4.685217    | -0.089270 |
| 37                                           | 1 | 0 | 2.950039  | 3.674678    | -1.848633 |
| 38                                           | 1 | 0 | -0.648393 | 0.503417    | 1.804263  |
| 39                                           | 1 | 0 | -0.391806 | -0.392677   | -0.974647 |
| 40                                           | 1 | 0 | 1.534935  | 0.593035    | 1.133175  |
| 41                                           | 1 | 0 | 1.796717  | 0.811790    | -1.929925 |
| 42                                           | 1 | 0 | 3.158304  | 2.173663    | -0.811235 |
| 43                                           | 1 | 0 | 0.753817  | 3.048481    | -1.555664 |
| 44                                           | 1 | 0 | 1.015383  | 2.896674    | 0.199089  |
| 45                                           | 1 | 0 | 6.048210  | -3.184152   | 0.495624  |
| -----                                        |   |   |           |             |           |
| Sum of electronic and zero-point Energies=   |   |   |           | -975.391807 |           |
| Sum of electronic and thermal Energies=      |   |   |           | -975.368992 |           |
| Sum of electronic and thermal Enthalpies=    |   |   |           | -975.368048 |           |
| Sum of electronic and thermal Free Energies= |   |   |           | -975.447529 |           |

**Table 13: Cartesian coordinates and energies for the structure '03TS04\_H<sub>2</sub>O'**

Standard orientation:

| Center<br>Number | Atomic<br>Number | Atomic<br>Type | Coordinates (Angstroms) |   |   |
|------------------|------------------|----------------|-------------------------|---|---|
|                  |                  |                | X                       | Y | Z |
| -----            |                  |                |                         |   |   |

|    |   |   |           |           |           |
|----|---|---|-----------|-----------|-----------|
| 1  | 7 | 0 | -5.219162 | -0.434842 | 0.053679  |
| 2  | 6 | 0 | -4.851317 | 0.154758  | 1.235270  |
| 3  | 6 | 0 | -3.518731 | 0.384607  | 1.501556  |
| 4  | 6 | 0 | -2.553857 | -0.001931 | 0.527665  |
| 5  | 6 | 0 | -2.961110 | -0.626187 | -0.718882 |
| 6  | 6 | 0 | -4.387369 | -0.829098 | -0.912021 |
| 7  | 6 | 0 | -1.149465 | 0.185020  | 0.770357  |
| 8  | 7 | 0 | -0.220557 | -0.198772 | -0.062663 |
| 9  | 6 | 0 | 1.247276  | 0.059595  | 0.053963  |
| 10 | 6 | 0 | 1.962403  | -1.304201 | 0.075381  |
| 11 | 6 | 0 | 3.400065  | -1.209407 | 0.593784  |
| 12 | 6 | 0 | 4.119081  | -2.539590 | 0.519077  |
| 13 | 8 | 0 | 5.339562  | -2.473534 | 1.099694  |
| 14 | 6 | 0 | -3.139917 | 1.026536  | 2.815185  |
| 15 | 8 | 0 | -2.159049 | -0.995973 | -1.617946 |
| 16 | 6 | 0 | -4.905839 | -1.469062 | -2.151914 |
| 17 | 6 | 0 | 1.677906  | 0.957266  | -1.088049 |
| 18 | 6 | 0 | 1.149468  | 2.371060  | -1.105838 |
| 19 | 7 | 0 | 2.239183  | 3.409835  | -0.708827 |
| 20 | 6 | 0 | 2.382637  | 3.646305  | 0.753387  |
| 21 | 8 | 0 | 3.686505  | -3.549631 | 0.005802  |
| 22 | 8 | 0 | 4.147317  | 1.796928  | -1.191465 |
| 23 | 1 | 0 | 1.485980  | 0.462143  | -2.045691 |
| 24 | 1 | 0 | 1.400617  | -2.003168 | 0.704845  |
| 25 | 1 | 0 | 1.961706  | -1.729329 | -0.934154 |
| 26 | 1 | 0 | 3.428334  | -0.872974 | 1.637981  |
| 27 | 1 | 0 | 3.991012  | -0.478164 | 0.030888  |
| 28 | 1 | 0 | 5.757328  | -3.347519 | 1.009082  |
| 29 | 1 | 0 | 0.848806  | 2.673310  | -2.112277 |
| 30 | 1 | 0 | 0.306045  | 2.577791  | -0.430673 |
| 31 | 1 | 0 | 1.372357  | 0.550825  | 1.029450  |
| 32 | 1 | 0 | 3.177143  | 4.374309  | 0.924214  |
| 33 | 1 | 0 | 1.441573  | 4.017332  | 1.165819  |
| 34 | 1 | 0 | 2.661742  | 2.705602  | 1.227571  |
| 35 | 1 | 0 | 3.176017  | 2.986975  | -1.062757 |
| 36 | 1 | 0 | 2.054911  | 4.296384  | -1.181112 |
| 37 | 1 | 0 | 3.169349  | 1.203881  | -1.180366 |
| 38 | 1 | 0 | 4.693748  | 1.584509  | -1.960511 |
| 39 | 1 | 0 | -0.816734 | 0.647341  | 1.696821  |
| 40 | 1 | 0 | -5.655523 | 0.409093  | 1.911494  |
| 41 | 1 | 0 | -2.497736 | 0.370025  | 3.411979  |
| 42 | 1 | 0 | -2.606882 | 1.971268  | 2.662587  |
| 43 | 1 | 0 | -4.028574 | 1.244658  | 3.410821  |
| 44 | 1 | 0 | -4.587032 | -0.896341 | -3.029263 |
| 45 | 1 | 0 | -4.468927 | -2.466985 | -2.266165 |
| 46 | 1 | 0 | -5.996080 | -1.550480 | -2.150312 |
| 47 | 1 | 0 | -6.212855 | -0.588409 | -0.096855 |
| 48 | 1 | 0 | -0.594640 | -0.631979 | -0.930940 |

---

Sum of electronic and zero-point Energies= -1051.832321  
Sum of electronic and thermal Energies= -1051.807759  
Sum of electronic and thermal Enthalpies= -1051.806815



Sum of electronic and thermal Free Energies= -1051.889972

**Table 14: Cartesian coordinates and energies for the structure '04'**

Standard orientation:

| Center Number | Atomic Number | Atomic Type | Coordinates (Angstroms) |           |           |
|---------------|---------------|-------------|-------------------------|-----------|-----------|
|               |               |             | X                       | Y         | Z         |
| 1             | 6             | 0           | 1.503387                | 5.276792  | 0.385212  |
| 2             | 7             | 0           | 2.022824                | 4.044646  | -0.206395 |
| 3             | 7             | 0           | -4.776787               | -0.837488 | -0.165822 |
| 4             | 6             | 0           | -3.961493               | -0.503241 | -1.162392 |
| 5             | 6             | 0           | -4.464772               | -0.366564 | -2.555367 |
| 6             | 6             | 0           | -2.555402               | -0.275167 | -0.849016 |
| 7             | 8             | 0           | -1.765040               | 0.045254  | -1.774470 |
| 8             | 6             | 0           | -2.161158               | -0.438761 | 0.537833  |
| 9             | 6             | 0           | -0.784297               | -0.235204 | 0.877905  |
| 10            | 6             | 0           | -3.113337               | -0.800248 | 1.537198  |
| 11            | 6             | 0           | -2.744506               | -0.981215 | 2.989855  |
| 12            | 6             | 0           | -4.420344               | -0.993423 | 1.151938  |
| 13            | 8             | 0           | 3.768552                | -3.389696 | -0.430545 |
| 14            | 6             | 0           | 4.396821                | -2.379982 | -0.194335 |
| 15            | 8             | 0           | 5.743055                | -2.342700 | -0.118302 |
| 16            | 6             | 0           | 3.792845                | -1.012652 | 0.073138  |
| 17            | 6             | 0           | 2.302092                | -0.977696 | -0.279248 |
| 18            | 6             | 0           | 1.566388                | 0.260105  | 0.275671  |
| 19            | 7             | 0           | 0.124494                | 0.093201  | 0.002097  |
| 20            | 6             | 0           | 2.052617                | 1.593803  | -0.311248 |
| 21            | 6             | 0           | 1.382929                | 2.835671  | 0.287705  |
| 22            | 1             | 0           | -5.754847               | -0.994100 | -0.398589 |
| 23            | 1             | 0           | -4.256519               | 0.642025  | -2.928173 |
| 24            | 1             | 0           | -5.536793               | -0.565954 | -2.629725 |
| 25            | 1             | 0           | -3.921872               | -1.052217 | -3.214941 |
| 26            | 1             | 0           | -5.216436               | -1.269410 | 1.829125  |
| 27            | 1             | 0           | -2.328353               | -0.062144 | 3.415833  |
| 28            | 1             | 0           | -2.006088               | -1.779666 | 3.119526  |
| 29            | 1             | 0           | -3.621741               | -1.248395 | 3.582079  |
| 30            | 1             | 0           | 3.955743                | -0.796157 | 1.138018  |
| 31            | 1             | 0           | 4.374996                | -0.269014 | -0.478948 |
| 32            | 1             | 0           | 1.828118                | -1.880167 | 0.119184  |
| 33            | 1             | 0           | 2.177038                | -1.018666 | -1.367886 |
| 34            | 1             | 0           | 0.412686                | 5.404521  | 0.268141  |
| 35            | 1             | 0           | 1.733469                | 5.290988  | 1.455962  |
| 36            | 1             | 0           | 2.002016                | 6.134889  | -0.072185 |
| 37            | 1             | 0           | 1.954676                | 4.091126  | -1.220103 |
| 38            | 1             | 0           | -0.454878               | -0.354313 | 1.907551  |
| 39            | 1             | 0           | -0.248034               | 0.185101  | -0.966271 |
| 40            | 1             | 0           | 1.671927                | 0.281512  | 1.368457  |
| 41            | 1             | 0           | 1.913434                | 1.575149  | -1.401673 |

|                                              |   |   |          |             |           |
|----------------------------------------------|---|---|----------|-------------|-----------|
| 42                                           | 1 | 0 | 3.129500 | 1.673749    | -0.136196 |
| 43                                           | 1 | 0 | 0.291855 | 2.814567    | 0.092898  |
| 44                                           | 1 | 0 | 1.504125 | 2.820613    | 1.380317  |
| 45                                           | 1 | 0 | 6.079113 | -3.242724   | -0.274125 |
| -----                                        |   |   |          |             |           |
| Sum of electronic and zero-point Energies=   |   |   |          | -975.469904 |           |
| Sum of electronic and thermal Energies=      |   |   |          | -975.446958 |           |
| Sum of electronic and thermal Enthalpies=    |   |   |          | -975.446014 |           |
| Sum of electronic and thermal Free Energies= |   |   |          | -975.525656 |           |

**Table 15: Cartesian coordinates and energies for the structure '04\_H<sub>2</sub>O'**

Standard orientation:

| Center<br>Number | Atomic<br>Number | Atomic<br>Type | Coordinates (Angstroms) |           |           |
|------------------|------------------|----------------|-------------------------|-----------|-----------|
|                  |                  |                | X                       | Y         | Z         |
| 1                | 7                | 0              | -4.798232               | -0.969952 | 0.228689  |
| 2                | 6                | 0              | -4.421188               | -0.192714 | 1.295981  |
| 3                | 6                | 0              | -3.108500               | 0.204736  | 1.425110  |
| 4                | 6                | 0              | -2.177754               | -0.208666 | 0.426933  |
| 5                | 6                | 0              | -2.594585               | -1.022542 | -0.698577 |
| 6                | 6                | 0              | -4.001516               | -1.400661 | -0.746628 |
| 7                | 6                | 0              | -0.799217               | 0.176455  | 0.527007  |
| 8                | 7                | 0              | 0.095948                | -0.179204 | -0.354927 |
| 9                | 6                | 0              | 1.533781                | 0.144419  | -0.281433 |
| 10               | 6                | 0              | 2.309157                | -1.181660 | -0.135309 |
| 11               | 6                | 0              | 3.799552                | -0.990011 | 0.162043  |
| 12               | 6                | 0              | 4.467497                | -2.295422 | 0.554722  |
| 13               | 8                | 0              | 5.808342                | -2.152743 | 0.634067  |
| 14               | 6                | 0              | -2.707343               | 1.042885  | 2.614228  |
| 15               | 8                | 0              | -1.822869               | -1.410310 | -1.615194 |
| 16               | 6                | 0              | -4.529744               | -2.243062 | -1.853655 |
| 17               | 6                | 0              | 1.941038                | 0.956286  | -1.527189 |
| 18               | 6                | 0              | 1.278997                | 2.329148  | -1.696487 |
| 19               | 7                | 0              | 1.680363                | 3.296832  | -0.658493 |
| 20               | 6                | 0              | 1.176702                | 4.654261  | -0.939714 |
| 21               | 8                | 0              | 3.893138                | -3.337383 | 0.784160  |
| 22               | 8                | 0              | 0.535040                | 2.611253  | 1.812147  |
| 23               | 1                | 0              | 1.730336                | 0.358132  | -2.423149 |
| 24               | 1                | 0              | 1.864514                | -1.760877 | 0.679476  |
| 25               | 1                | 0              | 2.186368                | -1.784527 | -1.043397 |
| 26               | 1                | 0              | 3.951389                | -0.290027 | 0.995033  |
| 27               | 1                | 0              | 4.351827                | -0.575866 | -0.687613 |
| 28               | 1                | 0              | 6.185517                | -3.008017 | 0.904945  |
| 29               | 1                | 0              | 1.526707                | 2.705763  | -2.701741 |
| 30               | 1                | 0              | 0.186326                | 2.237797  | -1.662064 |
| 31               | 1                | 0              | 1.667962                | 0.746656  | 0.621747  |
| 32               | 1                | 0              | 1.563479                | 5.349528  | -0.190347 |
| 33               | 1                | 0              | 1.462538                | 5.017335  | -1.937454 |

|    |   |   |           |           |           |
|----|---|---|-----------|-----------|-----------|
| 34 | 1 | 0 | 0.084621  | 4.655629  | -0.872736 |
| 35 | 1 | 0 | 1.003339  | 2.928860  | 0.992386  |
| 36 | 1 | 0 | 2.698812  | 3.333547  | -0.626876 |
| 37 | 1 | 0 | 3.029423  | 1.087068  | -1.503519 |
| 38 | 1 | 0 | 0.801919  | 3.186390  | 2.539430  |
| 39 | 1 | 0 | -0.455892 | 0.810981  | 1.342962  |
| 40 | 1 | 0 | -5.203744 | 0.065274  | 1.995766  |
| 41 | 1 | 0 | -2.033654 | 0.486690  | 3.275331  |
| 42 | 1 | 0 | -2.186097 | 1.955197  | 2.309489  |
| 43 | 1 | 0 | -3.584076 | 1.328669  | 3.198832  |
| 44 | 1 | 0 | -4.346084 | -1.752123 | -2.815337 |
| 45 | 1 | 0 | -3.986539 | -3.193490 | -1.889156 |
| 46 | 1 | 0 | -5.599367 | -2.441960 | -1.747732 |
| 47 | 1 | 0 | -5.777428 | -1.241565 | 0.181735  |
| 48 | 1 | 0 | -0.279227 | -0.766065 | -1.126529 |

-----  
 Sum of electronic and zero-point Energies= -1051.904579  
 Sum of electronic and thermal Energies= -1051.879151  
 Sum of electronic and thermal Enthalpies= -1051.878207  
 Sum of electronic and thermal Free Energies= -1051.962590

**Table 16: Cartesian coordinates and energies for the structure '03r03'**

Standard orientation:

| Center<br>Number | Atomic<br>Number | Atomic<br>Type | Coordinates (Angstroms) |           |           |
|------------------|------------------|----------------|-------------------------|-----------|-----------|
|                  |                  |                | X                       | Y         | Z         |
| 1                | 6                | 0              | -3.849681               | -1.892359 | 0.143348  |
| 2                | 7                | 0              | -4.577277               | -0.774952 | -0.192327 |
| 3                | 6                | 0              | -4.095470               | 0.453528  | -0.352100 |
| 4                | 6                | 0              | -2.662148               | 0.657037  | -0.159276 |
| 5                | 6                | 0              | -1.879154               | -0.511937 | 0.198025  |
| 6                | 6                | 0              | -2.492685               | -1.793214 | 0.346296  |
| 7                | 6                | 0              | -4.983955               | 1.588541  | -0.718184 |
| 8                | 8                | 0              | -2.182278               | 1.808925  | -0.307984 |
| 9                | 6                | 0              | -0.470915               | -0.352845 | 0.397441  |
| 10               | 7                | 0              | 0.143139                | 0.792939  | 0.269556  |
| 11               | 6                | 0              | 1.596660                | 1.057026  | 0.491356  |
| 12               | 6                | 0              | 2.456244                | -0.025431 | -0.189920 |
| 13               | 6                | 0              | 3.951728                | 0.142651  | 0.090802  |
| 14               | 6                | 0              | 4.739651                | -1.067443 | -0.374336 |
| 15               | 8                | 0              | 6.066033                | -0.830804 | -0.350729 |
| 16               | 6                | 0              | -1.715179               | -3.034362 | 0.712054  |
| 17               | 6                | 0              | 1.890667                | 2.449433  | -0.010340 |
| 18               | 6                | 0              | 2.266804                | 3.459824  | 0.775484  |
| 19               | 8                | 0              | 4.255345                | -2.127897 | -0.711764 |
| 20               | 1                | 0              | -1.221595               | -2.926707 | 1.683729  |
| 21               | 1                | 0              | -4.409052               | -2.813335 | 0.229636  |
| 22               | 1                | 0              | -5.577172               | -0.903526 | -0.330762 |

|                                              |   |   |           |           |             |
|----------------------------------------------|---|---|-----------|-----------|-------------|
| 23                                           | 1 | 0 | -6.027120 | 1.280475  | -0.824428   |
| 24                                           | 1 | 0 | -4.912882 | 2.374934  | 0.040960    |
| 25                                           | 1 | 0 | -4.641466 | 2.040248  | -1.655471   |
| 26                                           | 1 | 0 | 0.129039  | -1.215508 | 0.670391    |
| 27                                           | 1 | 0 | -2.376449 | -3.900534 | 0.775509    |
| 28                                           | 1 | 0 | -0.946961 | -3.261346 | -0.034679   |
| 29                                           | 1 | 0 | 2.485326  | 4.441095  | 0.366499    |
| 30                                           | 1 | 0 | 2.376193  | 3.342719  | 1.851256    |
| 31                                           | 1 | 0 | 1.794958  | 2.595747  | -1.086568   |
| 32                                           | 1 | 0 | 1.760771  | 1.026132  | 1.576736    |
| 33                                           | 1 | 0 | 2.162409  | -1.021421 | 0.154074    |
| 34                                           | 1 | 0 | 2.273442  | -0.001800 | -1.270562   |
| 35                                           | 1 | 0 | -0.491066 | 1.578724  | 0.023964    |
| 36                                           | 1 | 0 | 4.144070  | 0.257595  | 1.166172    |
| 37                                           | 1 | 0 | 4.364447  | 1.037904  | -0.383456   |
| 38                                           | 1 | 0 | 6.523865  | -1.641792 | -0.633700   |
| -----                                        |   |   |           |           |             |
| Sum of electronic and zero-point Energies=   |   |   |           |           | -879.639719 |
| Sum of electronic and thermal Energies=      |   |   |           |           | -879.620772 |
| Sum of electronic and thermal Enthalpies=    |   |   |           |           | -879.619828 |
| Sum of electronic and thermal Free Energies= |   |   |           |           | -879.688474 |

**Table 17: Cartesian coordinates and energies for the structure '03b'**

Standard orientation:

| -----            |                  |                |                         |           |           |  |
|------------------|------------------|----------------|-------------------------|-----------|-----------|--|
| Center<br>Number | Atomic<br>Number | Atomic<br>Type | Coordinates (Angstroms) |           |           |  |
|                  |                  |                | X                       | Y         | Z         |  |
| -----            |                  |                |                         |           |           |  |
| 1                | 6                | 0              | 3.769958                | -1.937309 | 0.251242  |  |
| 2                | 7                | 0              | 4.567076                | -0.843056 | 0.015244  |  |
| 3                | 6                | 0              | 4.145585                | 0.397595  | -0.212186 |  |
| 4                | 6                | 0              | 2.706963                | 0.642102  | -0.213926 |  |
| 5                | 6                | 0              | 1.850300                | -0.503216 | 0.030650  |  |
| 6                | 6                | 0              | 2.400745                | -1.799346 | 0.264846  |  |
| 7                | 6                | 0              | 5.108276                | 1.504522  | -0.457436 |  |
| 8                | 8                | 0              | 2.283708                | 1.807629  | -0.424733 |  |
| 9                | 6                | 0              | 0.430823                | -0.306567 | 0.029148  |  |
| 10               | 7                | 0              | -0.122535               | 0.857420  | -0.180474 |  |
| 11               | 6                | 0              | -1.571661               | 1.194725  | -0.180815 |  |
| 12               | 6                | 0              | -2.453226               | -0.057803 | -0.113251 |  |
| 13               | 6                | 0              | -3.940070               | 0.258950  | -0.294257 |  |
| 14               | 6                | 0              | -4.779039               | -1.002352 | -0.232055 |  |
| 15               | 8                | 0              | -6.087127               | -0.732788 | -0.410480 |  |
| 16               | 6                | 0              | 1.546169                | -3.016255 | 0.525615  |  |
| 17               | 6                | 0              | -1.816729               | 2.173442  | 0.947705  |  |
| 18               | 6                | 0              | -2.160089               | 3.450035  | 0.765424  |  |
| 19               | 8                | 0              | -4.344384               | -2.119907 | -0.044848 |  |
| 20               | 1                | 0              | 0.877067                | -3.225841 | -0.315568 |  |
| 21               | 1                | 0              | 4.285775                | -2.872709 | 0.417105  |  |

|                                              |   |   |           |           |             |
|----------------------------------------------|---|---|-----------|-----------|-------------|
| 22                                           | 1 | 0 | 5.572528  | -0.999291 | 0.014809    |
| 23                                           | 1 | 0 | 6.146661  | 1.165362  | -0.421750   |
| 24                                           | 1 | 0 | 4.909119  | 1.960442  | -1.433333   |
| 25                                           | 1 | 0 | 4.959601  | 2.297235  | 0.283659    |
| 26                                           | 1 | 0 | -0.225342 | -1.152556 | 0.203175    |
| 27                                           | 1 | 0 | 2.167958  | -3.900614 | 0.676922    |
| 28                                           | 1 | 0 | 0.930947  | -2.890591 | 1.422836    |
| 29                                           | 1 | 0 | -2.338521 | 4.111208  | 1.607480    |
| 30                                           | 1 | 0 | -2.281190 | 3.878323  | -0.226964   |
| 31                                           | 1 | 0 | -1.700509 | 1.770133  | 1.953626    |
| 32                                           | 1 | 0 | -1.738436 | 1.710314  | -1.135055   |
| 33                                           | 1 | 0 | -2.152916 | -0.765466 | -0.894041   |
| 34                                           | 1 | 0 | -2.317680 | -0.566512 | 0.848397    |
| 35                                           | 1 | 0 | 0.568075  | 1.621812  | -0.326443   |
| 36                                           | 1 | 0 | -4.134953 | 0.748564  | -1.256231   |
| 37                                           | 1 | 0 | -4.305531 | 0.949485  | 0.473806    |
| 38                                           | 1 | 0 | -6.580052 | -1.570453 | -0.359549   |
| -----                                        |   |   |           |           |             |
| Sum of electronic and zero-point Energies=   |   |   |           |           | -879.641273 |
| Sum of electronic and thermal Energies=      |   |   |           |           | -879.621579 |
| Sum of electronic and thermal Enthalpies=    |   |   |           |           | -879.620634 |
| Sum of electronic and thermal Free Energies= |   |   |           |           | -879.691621 |

**Table 18: Cartesian coordinates and energies for the structure '03TS05'**

Standard orientation:

| -----            |                  |                |                         |           |           |  |
|------------------|------------------|----------------|-------------------------|-----------|-----------|--|
| Center<br>Number | Atomic<br>Number | Atomic<br>Type | Coordinates (Angstroms) |           |           |  |
|                  |                  |                | X                       | Y         | Z         |  |
| -----            |                  |                |                         |           |           |  |
| 1                | 6                | 0              | 4.114473                | 1.868053  | 0.139971  |  |
| 2                | 7                | 0              | 4.800334                | 0.694054  | 0.022797  |  |
| 3                | 6                | 0              | 4.242847                | -0.521641 | -0.099200 |  |
| 4                | 6                | 0              | 2.810816                | -0.615714 | -0.110973 |  |
| 5                | 6                | 0              | 2.060860                | 0.617696  | 0.011962  |  |
| 6                | 6                | 0              | 2.734255                | 1.864321  | 0.138170  |  |
| 7                | 6                | 0              | 5.100246                | -1.734859 | -0.226744 |  |
| 8                | 8                | 0              | 2.253385                | -1.760283 | -0.229334 |  |
| 9                | 6                | 0              | 0.623784                | 0.555669  | -0.007560 |  |
| 10               | 7                | 0              | 0.011941                | -0.605394 | -0.152803 |  |
| 11               | 6                | 0              | -1.357596               | -0.899061 | -0.165559 |  |
| 12               | 6                | 0              | -2.247866               | 0.335550  | -0.153546 |  |
| 13               | 6                | 0              | -3.764678               | 0.147355  | -0.225289 |  |
| 14               | 6                | 0              | -4.476337               | 1.485939  | -0.126236 |  |
| 15               | 8                | 0              | -5.809807               | 1.339187  | -0.263955 |  |
| 16               | 6                | 0              | 1.994895                | 3.174404  | 0.263331  |  |
| 17               | 6                | 0              | -1.642211               | -2.199008 | -0.718484 |  |
| 18               | 6                | 0              | -2.816293               | -2.921569 | -0.742969 |  |
| 19               | 8                | 0              | -3.935686               | 2.555525  | 0.057852  |  |
| 20               | 1                | 0              | 1.347517                | 3.188077  | 1.146919  |  |

|                                              |   |   |           |             |           |
|----------------------------------------------|---|---|-----------|-------------|-----------|
| 21                                           | 1 | 0 | 4.712102  | 2.765036    | 0.229050  |
| 22                                           | 1 | 0 | 5.814748  | 0.743265    | 0.024817  |
| 23                                           | 1 | 0 | 6.165510  | -1.490835   | -0.189163 |
| 24                                           | 1 | 0 | 4.867968  | -2.445844   | 0.572871  |
| 25                                           | 1 | 0 | 4.885330  | -2.250479   | -1.168742 |
| 26                                           | 1 | 0 | 0.031926  | 1.456222    | 0.095950  |
| 27                                           | 1 | 0 | 2.693464  | 4.008660    | 0.355015  |
| 28                                           | 1 | 0 | 1.366350  | 3.365351    | -0.613245 |
| 29                                           | 1 | 0 | -2.801907 | -3.914591   | -1.179148 |
| 30                                           | 1 | 0 | -3.796382 | -2.469289   | -0.626538 |
| 31                                           | 1 | 0 | -0.747175 | -2.764464   | -0.986093 |
| 32                                           | 1 | 0 | -1.746870 | -1.692729   | 1.361230  |
| 33                                           | 1 | 0 | -2.027244 | 0.932374    | 0.740983  |
| 34                                           | 1 | 0 | -1.951626 | 0.976071    | -0.998960 |
| 35                                           | 1 | 0 | 0.743191  | -1.380304   | -0.242803 |
| 36                                           | 1 | 0 | -4.152598 | -0.478305   | 0.587242  |
| 37                                           | 1 | 0 | -4.077260 | -0.324432   | -1.161595 |
| 38                                           | 1 | 0 | -6.221485 | 2.218007    | -0.189735 |
| 39                                           | 8 | 0 | -2.340301 | -2.400225   | 1.905384  |
| 40                                           | 1 | 0 | -1.804703 | -2.938202   | 2.513286  |
| 41                                           | 1 | 0 | -2.590686 | -2.940643   | 1.017876  |
| -----                                        |   |   |           |             |           |
| Sum of electronic and zero-point Energies=   |   |   |           | -955.984456 |           |
| Sum of electronic and thermal Energies=      |   |   |           | -955.963303 |           |
| Sum of electronic and thermal Enthalpies=    |   |   |           | -955.962359 |           |
| Sum of electronic and thermal Free Energies= |   |   |           | -956.035825 |           |

**Table 19: Cartesian coordinates and energies for the structure '03TS05\_2H<sub>2</sub>O'**

Standard orientation:

| -----         |               |             |                         |           |           |  |
|---------------|---------------|-------------|-------------------------|-----------|-----------|--|
| Center Number | Atomic Number | Atomic Type | Coordinates (Angstroms) |           |           |  |
|               |               |             | X                       | Y         | Z         |  |
| -----         |               |             |                         |           |           |  |
| 1             | 6             | 0           | -4.420758               | -1.716632 | 0.240846  |  |
| 2             | 7             | 0           | -4.993329               | -0.481143 | 0.184102  |  |
| 3             | 6             | 0           | -4.322230               | 0.674526  | 0.012094  |  |
| 4             | 6             | 0           | -2.901117               | 0.622871  | -0.127106 |  |
| 5             | 6             | 0           | -2.267534               | -0.679655 | -0.067194 |  |
| 6             | 6             | 0           | -3.052500               | -1.851673 | 0.118475  |  |
| 7             | 6             | 0           | -5.062601               | 1.968860  | -0.043146 |  |
| 8             | 8             | 0           | -2.237292               | 1.708076  | -0.300865 |  |
| 9             | 6             | 0           | -0.840632               | -0.763085 | -0.210419 |  |
| 10            | 7             | 0           | -0.133930               | 0.338748  | -0.428198 |  |
| 11            | 6             | 0           | 1.238126                | 0.514833  | -0.552182 |  |
| 12            | 6             | 0           | 2.049554                | -0.764768 | -0.501695 |  |
| 13            | 6             | 0           | 3.569242                | -0.652378 | -0.342154 |  |
| 14            | 6             | 0           | 4.176779                | -1.978682 | 0.084083  |  |
| 15            | 8             | 0           | 5.524821                | -1.938397 | 0.022259  |  |
| 16            | 6             | 0           | -2.440002               | -3.229788 | 0.178107  |  |

|                                              |   |   |           |              |           |
|----------------------------------------------|---|---|-----------|--------------|-----------|
| 17                                           | 6 | 0 | 1.589680  | 1.758118     | -1.193495 |
| 18                                           | 6 | 0 | 2.794396  | 2.265944     | -1.603583 |
| 19                                           | 8 | 0 | 3.555460  | -2.953065    | 0.450079  |
| 20                                           | 1 | 0 | -1.721295 | -3.315778    | 1.000598  |
| 21                                           | 1 | 0 | -5.094146 | -2.551425    | 0.381376  |
| 22                                           | 1 | 0 | -6.002843 | -0.426247    | 0.272941  |
| 23                                           | 1 | 0 | -6.138198 | 1.832327     | 0.100873  |
| 24                                           | 1 | 0 | -4.685346 | 2.653810     | 0.723147  |
| 25                                           | 1 | 0 | -4.893184 | 2.461041     | -1.006757 |
| 26                                           | 1 | 0 | -0.331584 | -1.716303    | -0.151724 |
| 27                                           | 1 | 0 | -3.207282 | -3.991916    | 0.330575  |
| 28                                           | 1 | 0 | -1.911963 | -3.473300    | -0.750448 |
| 29                                           | 1 | 0 | 2.800051  | 3.197827     | -2.161744 |
| 30                                           | 1 | 0 | 3.711798  | 1.689538     | -1.618894 |
| 31                                           | 1 | 0 | 0.734550  | 2.423128     | -1.333344 |
| 32                                           | 1 | 0 | 1.481914  | 1.262458     | 1.116419  |
| 33                                           | 1 | 0 | 1.691389  | -1.373304    | 0.337344  |
| 34                                           | 1 | 0 | 1.834188  | -1.365259    | -1.400785 |
| 35                                           | 1 | 0 | -0.808134 | 1.175111     | -0.477828 |
| 36                                           | 1 | 0 | 3.849638  | 0.079429     | 0.426104  |
| 37                                           | 1 | 0 | 4.068982  | -0.342912    | -1.263344 |
| 38                                           | 1 | 0 | 5.866285  | -2.801223    | 0.315969  |
| 39                                           | 8 | 0 | 1.774601  | 1.753067     | 1.974700  |
| 40                                           | 1 | 0 | 0.994095  | 2.000835     | 2.496007  |
| 41                                           | 1 | 0 | 2.424953  | 2.658795     | 1.621205  |
| 42                                           | 1 | 0 | 3.079058  | 3.256254     | 0.062754  |
| 43                                           | 8 | 0 | 3.071586  | 3.544303     | 1.029205  |
| 44                                           | 1 | 0 | 3.972058  | 3.741063     | 1.329418  |
| -----                                        |   |   |           |              |           |
| Sum of electronic and zero-point Energies=   |   |   |           | -1032.430422 |           |
| Sum of electronic and thermal Energies=      |   |   |           | -1032.406572 |           |
| Sum of electronic and thermal Enthalpies=    |   |   |           | -1032.405628 |           |
| Sum of electronic and thermal Free Energies= |   |   |           | -1032.486459 |           |

**Table 20: Cartesian coordinates and energies for the structure '05a'**

Standard orientation:

| Center Number | Atomic Number | Atomic Type | Coordinates (Angstroms) |           |           |
|---------------|---------------|-------------|-------------------------|-----------|-----------|
|               |               |             | X                       | Y         | Z         |
| 1             | 6             | 0           | -3.829095               | -1.908332 | 0.000175  |
| 2             | 7             | 0           | -4.600099               | -0.773902 | -0.000125 |
| 3             | 6             | 0           | -4.145505               | 0.479227  | -0.000292 |
| 4             | 6             | 0           | -2.707544               | 0.683225  | -0.000196 |
| 5             | 6             | 0           | -1.874552               | -0.504291 | 0.000167  |
| 6             | 6             | 0           | -2.455732               | -1.807145 | 0.000335  |
| 7             | 6             | 0           | -5.083053               | 1.635113  | -0.000629 |
| 8             | 8             | 0           | -2.250850               | 1.861467  | -0.000373 |
| 9             | 6             | 0           | -0.450995               | -0.343146 | 0.000314  |

|                                              |   |   |           |             |           |
|----------------------------------------------|---|---|-----------|-------------|-----------|
| 10                                           | 7 | 0 | 0.108455  | 0.846387    | 0.000112  |
| 11                                           | 6 | 0 | 1.491331  | 1.178152    | 0.000290  |
| 12                                           | 6 | 0 | 2.400307  | -0.025939   | 0.000566  |
| 13                                           | 6 | 0 | 3.916232  | 0.169160    | -0.000009 |
| 14                                           | 6 | 0 | 4.616485  | -1.179449   | -0.000450 |
| 15                                           | 8 | 0 | 5.955139  | -1.032729   | -0.000406 |
| 16                                           | 6 | 0 | -1.627675 | -3.069060   | 0.000632  |
| 17                                           | 6 | 0 | 1.730450  | 2.510990    | 0.000187  |
| 18                                           | 6 | 0 | 3.004063  | 3.291387    | 0.000524  |
| 19                                           | 8 | 0 | 4.058421  | -2.256845   | -0.000804 |
| 20                                           | 1 | 0 | -0.985541 | -3.128095   | 0.885889  |
| 21                                           | 1 | 0 | -4.365264 | -2.847150   | 0.000266  |
| 22                                           | 1 | 0 | -5.609042 | -0.902149   | -0.000198 |
| 23                                           | 1 | 0 | -6.129201 | 1.318444    | -0.000223 |
| 24                                           | 1 | 0 | -4.896116 | 2.266328    | 0.874670  |
| 25                                           | 1 | 0 | -4.896565 | 2.265477    | -0.876646 |
| 26                                           | 1 | 0 | 0.190269  | -1.216008   | 0.000620  |
| 27                                           | 1 | 0 | -2.268340 | -3.952943   | 0.001075  |
| 28                                           | 1 | 0 | -0.985889 | -3.128690   | -0.884841 |
| 29                                           | 1 | 0 | 3.025369  | 3.952159    | -0.875343 |
| 30                                           | 1 | 0 | 3.911993  | 2.695368    | 0.000578  |
| 31                                           | 1 | 0 | 0.840946  | 3.141889    | -0.000098 |
| 32                                           | 1 | 0 | 2.147177  | -0.643835   | 0.872519  |
| 33                                           | 1 | 0 | 2.146741  | -0.644507   | -0.870772 |
| 34                                           | 1 | 0 | -0.611384 | 1.609950    | -0.000115 |
| 35                                           | 1 | 0 | 4.266010  | 0.718879    | 0.879592  |
| 36                                           | 1 | 0 | 4.265262  | 0.719032    | -0.879823 |
| 37                                           | 1 | 0 | 6.360050  | -1.917845   | -0.000748 |
| 38                                           | 1 | 0 | 3.025058  | 3.951794    | 0.876682  |
| -----                                        |   |   |           |             |           |
| Sum of electronic and zero-point Energies=   |   |   |           | -879.650811 |           |
| Sum of electronic and thermal Energies=      |   |   |           | -879.631011 |           |
| Sum of electronic and thermal Enthalpies=    |   |   |           | -879.630067 |           |
| Sum of electronic and thermal Free Energies= |   |   |           | -879.701027 |           |

**Table 21: Cartesian coordinates and energies for the structure '05TS06'**

Standard orientation:

| -----            |                  |                |                         |           |           |  |
|------------------|------------------|----------------|-------------------------|-----------|-----------|--|
| Center<br>Number | Atomic<br>Number | Atomic<br>Type | Coordinates (Angstroms) |           |           |  |
|                  |                  |                | X                       | Y         | Z         |  |
| -----            |                  |                |                         |           |           |  |
| 1                | 6                | 0              | 4.338682                | -1.859722 | -0.089599 |  |
| 2                | 7                | 0              | 4.940138                | -0.635219 | -0.080617 |  |
| 3                | 6                | 0              | 4.297618                | 0.543757  | -0.035313 |  |
| 4                | 6                | 0              | 2.863670                | 0.537851  | 0.012408  |  |
| 5                | 6                | 0              | 2.201741                | -0.751408 | -0.006267 |  |
| 6                | 6                | 0              | 2.962029                | -1.952538 | -0.053660 |  |
| 7                | 6                | 0              | 5.068484                | 1.820255  | -0.026380 |  |
| 8                | 8                | 0              | 2.228631                | 1.646224  | 0.070054  |  |



|                                              |   |   |           |             |           |
|----------------------------------------------|---|---|-----------|-------------|-----------|
| 9                                            | 6 | 0 | 0.764206  | -0.792581   | 0.033482  |
| 10                                           | 7 | 0 | 0.068229  | 0.327007    | 0.077912  |
| 11                                           | 6 | 0 | -1.311912 | 0.560761    | 0.016695  |
| 12                                           | 6 | 0 | -2.196165 | -0.646126   | 0.287996  |
| 13                                           | 6 | 0 | -3.621937 | -0.561269   | -0.274404 |
| 14                                           | 6 | 0 | -4.346240 | -1.892152   | -0.166376 |
| 15                                           | 8 | 0 | -5.672833 | -1.747063   | -0.370005 |
| 16                                           | 6 | 0 | 2.317863  | -3.317847   | -0.065417 |
| 17                                           | 6 | 0 | -1.680743 | 1.953565    | 0.582979  |
| 18                                           | 6 | 0 | -2.510241 | 2.073857    | 1.855331  |
| 19                                           | 8 | 0 | -3.816148 | -2.959829   | 0.051494  |
| 20                                           | 1 | 0 | 1.666154  | -3.446915   | -0.936362 |
| 21                                           | 1 | 0 | 4.997202  | -2.716826   | -0.126726 |
| 22                                           | 1 | 0 | 5.954950  | -0.612127   | -0.108802 |
| 23                                           | 1 | 0 | 6.147324  | 1.648488    | -0.077206 |
| 24                                           | 1 | 0 | 4.766965  | 2.448116    | -0.871261 |
| 25                                           | 1 | 0 | 4.840855  | 2.392177    | 0.879373  |
| 26                                           | 1 | 0 | 0.241887  | -1.740885   | 0.015232  |
| 27                                           | 1 | 0 | 3.073897  | -4.105040   | -0.101545 |
| 28                                           | 1 | 0 | 1.712162  | -3.483416   | 0.832101  |
| 29                                           | 1 | 0 | -1.950651 | 1.660146    | 2.699691  |
| 30                                           | 1 | 0 | -3.460775 | 1.537179    | 1.791819  |
| 31                                           | 1 | 0 | -0.762307 | 2.538036    | 0.697654  |
| 32                                           | 1 | 0 | -1.747043 | -1.530126   | -0.171116 |
| 33                                           | 1 | 0 | -2.242457 | -0.867399   | 1.365801  |
| 34                                           | 1 | 0 | 0.744856  | 1.151219    | 0.090370  |
| 35                                           | 1 | 0 | -3.601917 | -0.302973   | -1.341854 |
| 36                                           | 1 | 0 | -4.242190 | 0.194395    | 0.218188  |
| 37                                           | 1 | 0 | -6.083978 | -2.628204   | -0.324216 |
| 38                                           | 1 | 0 | -2.724841 | 3.122623    | 2.084868  |
| 39                                           | 1 | 0 | -3.369449 | 2.408682    | -0.620621 |
| 40                                           | 7 | 0 | -2.353552 | 2.503876    | -0.675022 |
| 41                                           | 1 | 0 | -1.818379 | 1.414055    | -1.119494 |
| 42                                           | 6 | 0 | -1.979689 | 3.859223    | -1.133928 |
| 43                                           | 1 | 0 | -2.226358 | 4.614676    | -0.380853 |
| 44                                           | 1 | 0 | -0.905717 | 3.882568    | -1.330471 |
| 45                                           | 1 | 0 | -2.515296 | 4.083479    | -2.058117 |
| -----                                        |   |   |           |             |           |
| Sum of electronic and zero-point Energies=   |   |   |           | -975.409488 |           |
| Sum of electronic and thermal Energies=      |   |   |           | -975.386757 |           |
| Sum of electronic and thermal Enthalpies=    |   |   |           | -975.385813 |           |
| Sum of electronic and thermal Free Energies= |   |   |           | -975.463154 |           |

**Table 22: Cartesian coordinates and energies for the structure '05TS06\_H<sub>2</sub>O'**

Standard orientation:

| -----            |                  |                |                         |   |   |
|------------------|------------------|----------------|-------------------------|---|---|
| Center<br>Number | Atomic<br>Number | Atomic<br>Type | Coordinates (Angstroms) |   |   |
|                  |                  |                | X                       | Y | Z |
| -----            |                  |                |                         |   |   |

|                                            |   |   |           |              |           |
|--------------------------------------------|---|---|-----------|--------------|-----------|
| 1                                          | 6 | 0 | 1.196581  | 0.418084     | 0.100664  |
| 2                                          | 6 | 0 | 1.615739  | 1.716041     | -0.637597 |
| 3                                          | 1 | 0 | 0.784781  | 2.421749     | -0.534472 |
| 4                                          | 1 | 0 | 3.692599  | 4.245758     | 0.513181  |
| 5                                          | 6 | 0 | 2.835895  | 3.874043     | -0.051060 |
| 6                                          | 1 | 0 | 2.947335  | 4.140228     | -1.103215 |
| 7                                          | 1 | 0 | 1.923847  | 4.316076     | 0.352178  |
| 8                                          | 7 | 0 | 2.756302  | 2.395431     | 0.120281  |
| 9                                          | 1 | 0 | 2.580612  | 2.139095     | 1.202583  |
| 10                                         | 1 | 0 | 3.644836  | 1.975352     | -0.158301 |
| 11                                         | 1 | 0 | 1.440885  | 0.812342     | 1.404570  |
| 12                                         | 8 | 0 | 1.872400  | 1.556377     | 2.295601  |
| 13                                         | 1 | 0 | 2.238679  | 1.118592     | 3.075628  |
| 14                                         | 6 | 0 | 1.952672  | 1.567887     | -2.123849 |
| 15                                         | 1 | 0 | 1.097822  | 1.129807     | -2.646842 |
| 16                                         | 1 | 0 | 2.160081  | 2.533555     | -2.594229 |
| 17                                         | 1 | 0 | 2.813758  | 0.913339     | -2.290718 |
| 18                                         | 6 | 0 | 1.948576  | -0.877368    | -0.188479 |
| 19                                         | 1 | 0 | 1.547387  | -1.665281    | 0.457385  |
| 20                                         | 1 | 0 | 1.772448  | -1.223500    | -1.219483 |
| 21                                         | 6 | 0 | 3.457999  | -0.835786    | 0.076078  |
| 22                                         | 1 | 0 | 4.006323  | -0.226838    | -0.651749 |
| 23                                         | 1 | 0 | 3.675592  | -0.416468    | 1.067168  |
| 24                                         | 6 | 0 | 4.073578  | -2.224844    | 0.046965  |
| 25                                         | 8 | 0 | 5.422226  | -2.160447    | 0.027358  |
| 26                                         | 1 | 0 | 5.768840  | -3.069947    | 0.038199  |
| 27                                         | 8 | 0 | 3.453877  | -3.265620    | 0.056633  |
| 28                                         | 7 | 0 | -0.209856 | 0.281681     | -0.011507 |
| 29                                         | 6 | 0 | -0.954404 | -0.802035    | -0.053387 |
| 30                                         | 1 | 0 | -0.469424 | -1.769525    | -0.093592 |
| 31                                         | 6 | 0 | -2.391185 | -0.710271    | -0.028163 |
| 32                                         | 6 | 0 | -3.002910 | 0.603005     | 0.005126  |
| 33                                         | 6 | 0 | -3.193448 | -1.883959    | -0.039391 |
| 34                                         | 6 | 0 | -4.439900 | 0.657831     | 0.048597  |
| 35                                         | 6 | 0 | -4.566174 | -1.743206    | -0.005819 |
| 36                                         | 1 | 0 | -5.256284 | -2.575771    | -0.008445 |
| 37                                         | 1 | 0 | -0.832107 | 1.140033     | 0.028278  |
| 38                                         | 6 | 0 | -2.600141 | -3.271689    | -0.081142 |
| 39                                         | 1 | 0 | -1.992293 | -3.422084    | -0.979860 |
| 40                                         | 1 | 0 | -1.962424 | -3.461610    | 0.788941  |
| 41                                         | 1 | 0 | -3.385283 | -4.030640    | -0.084890 |
| 42                                         | 6 | 0 | -5.161970 | 1.960943     | 0.098084  |
| 43                                         | 1 | 0 | -4.829679 | 2.540552     | 0.965567  |
| 44                                         | 1 | 0 | -4.917124 | 2.561273     | -0.784622 |
| 45                                         | 1 | 0 | -6.246248 | 1.828465     | 0.149899  |
| 46                                         | 8 | 0 | -2.331464 | 1.686169     | -0.003466 |
| 47                                         | 7 | 0 | -5.122271 | -0.497006    | 0.038565  |
| 48                                         | 1 | 0 | -6.135951 | -0.439185    | 0.066707  |
| -----                                      |   |   |           |              |           |
| Sum of electronic and zero-point Energies= |   |   |           | -1051.850380 |           |
| Sum of electronic and thermal Energies=    |   |   |           | -1051.825937 |           |
| Sum of electronic and thermal Enthalpies=  |   |   |           | -1051.824993 |           |

Sum of electronic and thermal Free Energies= -1051.905528

**Table 23: Cartesian coordinates and energies for the structure '06'**

Standard orientation:

| Center Number | Atomic Number | Atomic Type | Coordinates (Angstroms) |           |           |
|---------------|---------------|-------------|-------------------------|-----------|-----------|
|               |               |             | X                       | Y         | Z         |
| 1             | 6             | 0           | 4.281025                | -1.752387 | 0.411077  |
| 2             | 7             | 0           | 4.947947                | -0.616631 | 0.022648  |
| 3             | 6             | 0           | 4.387104                | 0.530346  | -0.352567 |
| 4             | 6             | 0           | 2.931787                | 0.610548  | -0.358134 |
| 5             | 6             | 0           | 2.210885                | -0.581518 | 0.045431  |
| 6             | 6             | 0           | 2.904403                | -1.766842 | 0.432303  |
| 7             | 6             | 0           | 5.218782                | 1.696022  | -0.755972 |
| 8             | 8             | 0           | 2.377267                | 1.685679  | -0.708407 |
| 9             | 6             | 0           | 0.776376                | -0.549941 | 0.037957  |
| 10            | 7             | 0           | 0.094662                | 0.503703  | -0.319770 |
| 11            | 6             | 0           | -1.375397               | 0.677958  | -0.380971 |
| 12            | 6             | 0           | -2.099870               | -0.640109 | -0.097071 |
| 13            | 6             | 0           | -3.607687               | -0.623709 | -0.371862 |
| 14            | 6             | 0           | -4.162229               | -2.034986 | -0.436585 |
| 15            | 8             | 0           | -5.508330               | -2.030275 | -0.509373 |
| 16            | 6             | 0           | 2.193651                | -3.028756 | 0.858633  |
| 17            | 6             | 0           | -1.744036               | 1.921879  | 0.501898  |
| 18            | 6             | 0           | -1.674891               | 1.643983  | 2.009935  |
| 19            | 8             | 0           | -3.498331               | -3.051303 | -0.430769 |
| 20            | 1             | 0           | 1.552605                | -3.418733 | 0.060995  |
| 21            | 1             | 0           | 4.899365                | -2.596214 | 0.683508  |
| 22            | 1             | 0           | 5.964469                | -0.658638 | 0.021215  |
| 23            | 1             | 0           | 6.288664                | 1.479211  | -0.701286 |
| 24            | 1             | 0           | 4.962402                | 1.999845  | -1.776590 |
| 25            | 1             | 0           | 4.989996                | 2.555387  | -0.116572 |
| 26            | 1             | 0           | 0.223027                | -1.434495 | 0.332770  |
| 27            | 1             | 0           | 2.912226                | -3.810330 | 1.112498  |
| 28            | 1             | 0           | 1.568004                | -2.859161 | 1.741281  |
| 29            | 1             | 0           | -0.702065               | 1.241617  | 2.314012  |
| 30            | 1             | 0           | -2.447423               | 0.933065  | 2.323409  |
| 31            | 1             | 0           | -0.986222               | 2.679775  | 0.262329  |
| 32            | 1             | 0           | -1.673281               | -1.421113 | -0.735931 |
| 33            | 1             | 0           | -1.928419               | -0.960658 | 0.937503  |
| 34            | 1             | 0           | 0.705037                | 1.303445  | -0.587528 |
| 35            | 1             | 0           | -3.839515               | -0.126608 | -1.320911 |
| 36            | 1             | 0           | -4.173044               | -0.079338 | 0.389252  |
| 37            | 1             | 0           | -5.811969               | -2.953056 | -0.567925 |
| 38            | 1             | 0           | -1.833826               | 2.573109  | 2.564948  |
| 39            | 1             | 0           | -3.778315               | 2.145196  | 0.665962  |
| 40            | 7             | 0           | -3.029821               | 2.464660  | 0.058292  |
| 41            | 1             | 0           | -1.582166               | 0.985089  | -1.413335 |

|                                              |   |   |           |             |           |
|----------------------------------------------|---|---|-----------|-------------|-----------|
| 42                                           | 6 | 0 | -3.081529 | 3.927984    | -0.049539 |
| 43                                           | 1 | 0 | -2.799243 | 4.457307    | 0.874926  |
| 44                                           | 1 | 0 | -2.417222 | 4.260827    | -0.853078 |
| 45                                           | 1 | 0 | -4.097686 | 4.226717    | -0.318442 |
| -----                                        |   |   |           |             |           |
| Sum of electronic and zero-point Energies=   |   |   |           | -975.466854 |           |
| Sum of electronic and thermal Energies=      |   |   |           | -975.444694 |           |
| Sum of electronic and thermal Enthalpies=    |   |   |           | -975.443750 |           |
| Sum of electronic and thermal Free Energies= |   |   |           | -975.520345 |           |

**Table 24: Cartesian coordinates and energies for the structure '05br05a'**

Standard orientation:

| Center<br>Number | Atomic<br>Number | Atomic<br>Type | Coordinates (Angstroms) |           |           |
|------------------|------------------|----------------|-------------------------|-----------|-----------|
|                  |                  |                | X                       | Y         | Z         |
| 1                | 6                | 0              | 1.856262                | -0.485953 | 0.133341  |
| 2                | 6                | 0              | 2.460862                | -1.772195 | 0.255945  |
| 3                | 6                | 0              | 3.826725                | -1.867322 | 0.108480  |
| 4                | 7                | 0              | 4.568300                | -0.742468 | -0.148408 |
| 5                | 6                | 0              | 4.090404                | 0.495460  | -0.277372 |
| 6                | 6                | 0              | 2.658431                | 0.691789  | -0.137392 |
| 7                | 6                | 0              | 1.664448                | -3.022958 | 0.537839  |
| 8                | 6                | 0              | 4.997436                | 1.641804  | -0.557121 |
| 9                | 8                | 0              | 2.179642                | 1.855568  | -0.254392 |
| 10               | 6                | 0              | 0.438949                | -0.332756 | 0.274964  |
| 11               | 7                | 0              | -0.142341               | 0.840079  | 0.158984  |
| 12               | 6                | 0              | -1.517259               | 1.176389  | 0.278710  |
| 13               | 6                | 0              | -2.460137               | 0.011684  | 0.474030  |
| 14               | 6                | 0              | -3.892584               | 0.149898  | -0.062086 |
| 15               | 6                | 0              | -4.488943               | -1.218101 | -0.356523 |
| 16               | 8                | 0              | -5.816543               | -1.136725 | -0.561380 |
| 17               | 6                | 0              | -1.766700               | 2.505741  | 0.225234  |
| 18               | 6                | 0              | -3.054794               | 3.242539  | 0.396971  |
| 19               | 8                | 0              | -3.863163               | -2.256171 | -0.421545 |
| 20               | 1                | 0              | 0.925099                | -3.214267 | -0.247131 |
| 21               | 1                | 0              | 4.378713                | -2.794025 | 0.181877  |
| 22               | 1                | 0              | 5.572850                | -0.865504 | -0.248957 |
| 23               | 1                | 0              | 6.042561                | 1.331672  | -0.636230 |
| 24               | 1                | 0              | 4.696226                | 2.137078  | -1.486382 |
| 25               | 1                | 0              | 4.902822                | 2.393702  | 0.233670  |
| 26               | 1                | 0              | -0.177936               | -1.197487 | 0.487734  |
| 27               | 1                | 0              | 2.318720                | -3.895172 | 0.591907  |
| 28               | 1                | 0              | 1.131677                | -2.952108 | 1.492137  |
| 29               | 1                | 0              | -2.902154               | 4.075734  | 1.092445  |
| 30               | 1                | 0              | -3.871501               | 2.631365  | 0.775425  |
| 31               | 1                | 0              | -0.903578               | 3.148415  | 0.051109  |
| 32               | 1                | 0              | -2.046010               | -0.860258 | -0.040318 |
| 33               | 1                | 0              | -2.489014               | -0.262915 | 1.537728  |

|                                              |   |   |           |             |           |
|----------------------------------------------|---|---|-----------|-------------|-----------|
| 34                                           | 1 | 0 | 0.560729  | 1.597903    | -0.026358 |
| 35                                           | 1 | 0 | -3.915540 | 0.713419    | -1.002619 |
| 36                                           | 1 | 0 | -4.565874 | 0.665197    | 0.626182  |
| 37                                           | 1 | 0 | -6.148449 | -2.026771   | -0.774035 |
| 38                                           | 1 | 0 | -3.369142 | 3.693266    | -0.553802 |
| -----                                        |   |   |           |             |           |
| Sum of electronic and zero-point Energies=   |   |   |           | -879.650667 |           |
| Sum of electronic and thermal Energies=      |   |   |           | -879.631636 |           |
| Sum of electronic and thermal Enthalpies=    |   |   |           | -879.630692 |           |
| Sum of electronic and thermal Free Energies= |   |   |           | -879.699116 |           |

**Table 25: Cartesian coordinates and energies for the structure '05b'**

Standard orientation:

| Center<br>Number | Atomic<br>Number | Atomic<br>Type | Coordinates (Angstroms) |           |           |
|------------------|------------------|----------------|-------------------------|-----------|-----------|
|                  |                  |                | X                       | Y         | Z         |
| 1                | 6                | 0              | -1.526848               | -0.305215 | -0.286816 |
| 2                | 6                | 0              | -2.191958               | -1.548153 | -0.502816 |
| 3                | 6                | 0              | -3.548760               | -1.610006 | -0.272330 |
| 4                | 7                | 0              | -4.222858               | -0.493282 | 0.151368  |
| 5                | 6                | 0              | -3.683908               | 0.704476  | 0.381135  |
| 6                | 6                | 0              | -2.255839               | 0.861770  | 0.171018  |
| 7                | 6                | 0              | -1.467158               | -2.786405 | -0.970376 |
| 8                | 6                | 0              | -4.521358               | 1.845304  | 0.842585  |
| 9                | 8                | 0              | -1.718830               | 1.984647  | 0.391467  |
| 10               | 6                | 0              | -0.116933               | -0.194162 | -0.514840 |
| 11               | 7                | 0              | 0.523256                | 0.933128  | -0.304450 |
| 12               | 6                | 0              | 1.894901                | 1.234517  | -0.488188 |
| 13               | 6                | 0              | 2.814744                | 0.207979  | -1.118934 |
| 14               | 6                | 0              | 3.740370                | -0.549820 | -0.147058 |
| 15               | 6                | 0              | 3.069652                | -1.646475 | 0.651977  |
| 16               | 8                | 0              | 3.851489                | -2.073946 | 1.655780  |
| 17               | 6                | 0              | 2.272716                | 2.475253  | -0.105340 |
| 18               | 6                | 0              | 3.637860                | 3.072561  | -0.208069 |
| 19               | 8                | 0              | 1.973208                | -2.124871 | 0.417844  |
| 20               | 1                | 0              | -0.648715               | -3.051727 | -0.293929 |
| 21               | 1                | 0              | -4.143858               | -2.502813 | -0.404909 |
| 22               | 1                | 0              | -5.223509               | -0.589501 | 0.305024  |
| 23               | 1                | 0              | -5.573506               | 1.568652  | 0.949073  |
| 24               | 1                | 0              | -4.147255               | 2.218619  | 1.801884  |
| 25               | 1                | 0              | -4.436799               | 2.678838  | 0.137207  |
| 26               | 1                | 0              | 0.456818                | -1.056765 | -0.827663 |
| 27               | 1                | 0              | -2.149416               | -3.637083 | -1.024484 |
| 28               | 1                | 0              | -1.040291               | -2.642182 | -1.968990 |
| 29               | 1                | 0              | 3.591763                | 4.022270  | -0.754699 |
| 30               | 1                | 0              | 4.364100                | 2.425971  | -0.703719 |
| 31               | 1                | 0              | 1.510130                | 3.121603  | 0.328290  |
| 32               | 1                | 0              | 2.245255                | -0.511204 | -1.712923 |

|                                              |   |   |           |             |           |
|----------------------------------------------|---|---|-----------|-------------|-----------|
| 33                                           | 1 | 0 | 3.451523  | 0.737250    | -1.832980 |
| 34                                           | 1 | 0 | -0.121810 | 1.687738    | 0.034301  |
| 35                                           | 1 | 0 | 4.242610  | 0.130132    | 0.547160  |
| 36                                           | 1 | 0 | 4.541286  | -1.037923   | -0.717682 |
| 37                                           | 1 | 0 | 3.404124  | -2.811307   | 2.107232  |
| 38                                           | 1 | 0 | 4.022946  | 3.314125    | 0.790966  |
| -----                                        |   |   |           |             |           |
| Sum of electronic and zero-point Energies=   |   |   |           | -879.660185 |           |
| Sum of electronic and thermal Energies=      |   |   |           | -879.640626 |           |
| Sum of electronic and thermal Enthalpies=    |   |   |           | -879.639682 |           |
| Sum of electronic and thermal Free Energies= |   |   |           | -879.709384 |           |

**Table 26: Cartesian coordinates and energies for the structure '05TS07'**

Standard orientation:

| Center<br>Number | Atomic<br>Number | Atomic<br>Type | Coordinates (Angstroms) |           |           |
|------------------|------------------|----------------|-------------------------|-----------|-----------|
|                  |                  |                | X                       | Y         | Z         |
| 1                | 6                | 0              | -2.300176               | -1.262191 | -1.046574 |
| 2                | 6                | 0              | -3.683935               | -1.236386 | -1.144144 |
| 3                | 7                | 0              | -4.380026               | -0.229293 | -0.545437 |
| 4                | 6                | 0              | -3.846019               | 0.777291  | 0.159107  |
| 5                | 6                | 0              | -2.407618               | 0.827959  | 0.307438  |
| 6                | 6                | 0              | -1.658832               | -0.230035 | -0.329882 |
| 7                | 6                | 0              | -4.716485               | 1.824145  | 0.764388  |
| 8                | 8                | 0              | -1.869236               | 1.761750  | 0.971395  |
| 9                | 6                | 0              | -0.185975               | -0.190229 | -0.206609 |
| 10               | 7                | 0              | 0.036573                | -0.843212 | 1.678526  |
| 11               | 6                | 0              | -0.577327               | -2.108870 | 2.108222  |
| 12               | 6                | 0              | -1.548882               | -2.377130 | -1.739276 |
| 13               | 7                | 0              | 0.416890                | 1.011957  | -0.237064 |
| 14               | 6                | 0              | 1.782530                | 1.332282  | -0.490760 |
| 15               | 6                | 0              | 2.238048                | 2.500132  | 0.003933  |
| 16               | 6                | 0              | 3.557642                | 3.154096  | -0.284793 |
| 17               | 6                | 0              | 2.569334                | 0.433664  | -1.432056 |
| 18               | 6                | 0              | 3.868580                | -0.175028 | -0.878543 |
| 19               | 6                | 0              | 3.685778                | -1.200076 | 0.213254  |
| 20               | 8                | 0              | 2.614936                | -1.593948 | 0.651783  |
| 21               | 8                | 0              | 4.860719                | -1.662897 | 0.662711  |
| 22               | 1                | 0              | -0.933905               | -2.951600 | -1.039246 |
| 23               | 1                | 0              | -4.265896               | -1.971620 | -1.682177 |
| 24               | 1                | 0              | -5.391621               | -0.241320 | -0.643993 |
| 25               | 1                | 0              | -5.777214               | 1.645383  | 0.567138  |
| 26               | 1                | 0              | -4.553769               | 1.867710  | 1.846492  |
| 27               | 1                | 0              | -4.439781               | 2.810327  | 0.376459  |
| 28               | 1                | 0              | 0.375684                | -1.010739 | -0.634468 |
| 29               | 1                | 0              | -2.240931               | -3.075232 | -2.215086 |
| 30               | 1                | 0              | -0.888503               | -1.986268 | -2.520719 |
| 31               | 1                | 0              | 3.407671                | 4.220021  | -0.488269 |

|                                              |   |   |           |           |             |
|----------------------------------------------|---|---|-----------|-----------|-------------|
| 32                                           | 1 | 0 | 4.071660  | 2.724058  | -1.148142   |
| 33                                           | 1 | 0 | 1.569962  | 3.061696  | 0.656406    |
| 34                                           | 1 | 0 | 1.935046  | -0.369193 | -1.815479   |
| 35                                           | 1 | 0 | 2.844314  | 1.030085  | -2.310066   |
| 36                                           | 1 | 0 | -0.173780 | 1.756146  | 0.151090    |
| 37                                           | 1 | 0 | 4.546398  | 0.592811  | -0.493682   |
| 38                                           | 1 | 0 | 4.421126  | -0.667497 | -1.688553   |
| 39                                           | 1 | 0 | 4.694498  | -2.331688 | 1.350061    |
| 40                                           | 1 | 0 | 4.235507  | 3.096615  | 0.577012    |
| 41                                           | 1 | 0 | -1.647313 | -2.089395 | 1.887785    |
| 42                                           | 1 | 0 | -0.112742 | -2.933138 | 1.563248    |
| 43                                           | 1 | 0 | -0.444085 | -2.281850 | 3.181610    |
| 44                                           | 1 | 0 | -0.311644 | -0.043134 | 2.205926    |
| 45                                           | 1 | 0 | 1.053927  | -0.885333 | 1.735149    |
| -----                                        |   |   |           |           |             |
| Sum of electronic and zero-point Energies=   |   |   |           |           | -975.459100 |
| Sum of electronic and thermal Energies=      |   |   |           |           | -975.435883 |
| Sum of electronic and thermal Enthalpies=    |   |   |           |           | -975.434938 |
| Sum of electronic and thermal Free Energies= |   |   |           |           | -975.513102 |

**Table 27: Cartesian coordinates and energies for the structure '07'**

Standard orientation:

| -----            |                  |                |                         |           |           |  |
|------------------|------------------|----------------|-------------------------|-----------|-----------|--|
| Center<br>Number | Atomic<br>Number | Atomic<br>Type | Coordinates (Angstroms) |           |           |  |
|                  |                  |                | X                       | Y         | Z         |  |
| -----            |                  |                |                         |           |           |  |
| 1                | 6                | 0              | -1.725274               | -0.346250 | -0.234035 |  |
| 2                | 6                | 0              | -2.315210               | -1.125868 | -1.243497 |  |
| 3                | 6                | 0              | -3.689659               | -1.035510 | -1.425279 |  |
| 4                | 7                | 0              | -4.414960               | -0.201396 | -0.633861 |  |
| 5                | 6                | 0              | -3.920159               | 0.572971  | 0.344900  |  |
| 6                | 6                | 0              | -2.502134               | 0.539470  | 0.589473  |  |
| 7                | 6                | 0              | -1.516355               | -2.033289 | -2.149279 |  |
| 8                | 6                | 0              | -4.820447               | 1.458185  | 1.137381  |  |
| 9                | 8                | 0              | -1.994134               | 1.276089  | 1.504030  |  |
| 10               | 6                | 0              | -0.218625               | -0.321649 | -0.031188 |  |
| 11               | 7                | 0              | 0.338074                | 0.817429  | -0.695602 |  |
| 12               | 6                | 0              | 1.741065                | 1.083745  | -0.806944 |  |
| 13               | 6                | 0              | 2.562902                | 0.002250  | -1.492859 |  |
| 14               | 6                | 0              | 3.882482                | -0.406163 | -0.819713 |  |
| 15               | 6                | 0              | 3.749602                | -1.000176 | 0.559976  |  |
| 16               | 8                | 0              | 4.936768                | -1.363095 | 1.062932  |  |
| 17               | 6                | 0              | 2.193286                | 2.309666  | -0.480952 |  |
| 18               | 6                | 0              | 3.534720                | 2.910522  | -0.803806 |  |
| 19               | 8                | 0              | 2.706225                | -1.155801 | 1.180645  |  |
| 20               | 7                | 0              | 0.067369                | -0.282669 | 1.488035  |  |
| 21               | 6                | 0              | -0.246454               | -1.533006 | 2.232172  |  |
| 22               | 1                | 0              | -1.024007               | -2.833362 | -1.585547 |  |
| 23               | 1                | 0              | -4.237191               | -1.589530 | -2.175258 |  |

|                                              |   |   |           |             |           |
|----------------------------------------------|---|---|-----------|-------------|-----------|
| 24                                           | 1 | 0 | -5.416818 | -0.156135   | -0.798582 |
| 25                                           | 1 | 0 | -5.870446 | 1.337824    | 0.856285  |
| 26                                           | 1 | 0 | -4.707002 | 1.246784    | 2.205601  |
| 27                                           | 1 | 0 | -4.532324 | 2.506396    | 1.002404  |
| 28                                           | 1 | 0 | 0.260605  | -1.237299   | -0.379988 |
| 29                                           | 1 | 0 | -2.159039 | -2.506971   | -2.894376 |
| 30                                           | 1 | 0 | -0.743519 | -1.471809   | -2.683758 |
| 31                                           | 1 | 0 | 3.406574  | 3.947582    | -1.131755 |
| 32                                           | 1 | 0 | 4.057797  | 2.383325    | -1.606235 |
| 33                                           | 1 | 0 | 1.491545  | 2.981871    | 0.013783  |
| 34                                           | 1 | 0 | 1.948114  | -0.890636   | -1.636726 |
| 35                                           | 1 | 0 | 2.808265  | 0.347863    | -2.505310 |
| 36                                           | 1 | 0 | -0.200993 | 1.659673    | -0.523144 |
| 37                                           | 1 | 0 | 4.578222  | 0.433822    | -0.736558 |
| 38                                           | 1 | 0 | 4.403081  | -1.146639   | -1.439366 |
| 39                                           | 1 | 0 | 4.802428  | -1.738163   | 1.951085  |
| 40                                           | 1 | 0 | 4.196526  | 2.942400    | 0.071716  |
| 41                                           | 1 | 0 | -1.307412 | -1.758442   | 2.124548  |
| 42                                           | 1 | 0 | 0.362090  | -2.347849   | 1.838812  |
| 43                                           | 1 | 0 | -0.012631 | -1.379765   | 3.286515  |
| 44                                           | 1 | 0 | -0.555829 | 0.512282    | 1.812698  |
| 45                                           | 1 | 0 | 1.069290  | -0.083694   | 1.584213  |
| -----                                        |   |   |           |             |           |
| Sum of electronic and zero-point Energies=   |   |   |           | -975.468623 |           |
| Sum of electronic and thermal Energies=      |   |   |           | -975.445797 |           |
| Sum of electronic and thermal Enthalpies=    |   |   |           | -975.444853 |           |
| Sum of electronic and thermal Free Energies= |   |   |           | -975.521626 |           |

**Table 28: Cartesian coordinates and energies for the structure '07TS08'**

Standard orientation:

| -----            |                  |                |                         |           |           |  |
|------------------|------------------|----------------|-------------------------|-----------|-----------|--|
| Center<br>Number | Atomic<br>Number | Atomic<br>Type | Coordinates (Angstroms) |           |           |  |
|                  |                  |                | X                       | Y         | Z         |  |
| -----            |                  |                |                         |           |           |  |
| 1                | 6                | 0              | 3.599761                | 0.035760  | 1.627203  |  |
| 2                | 7                | 0              | 4.247674                | 0.303288  | 0.460502  |  |
| 3                | 6                | 0              | 3.700367                | 0.273582  | -0.764734 |  |
| 4                | 6                | 0              | 2.305002                | -0.072305 | -0.876342 |  |
| 5                | 6                | 0              | 1.612232                | -0.368323 | 0.349753  |  |
| 6                | 6                | 0              | 2.253488                | -0.308337 | 1.600262  |  |
| 7                | 6                | 0              | 4.518954                | 0.590126  | -1.969309 |  |
| 8                | 8                | 0              | 1.725165                | -0.111132 | -2.006544 |  |
| 9                | 6                | 0              | 0.165692                | -0.739966 | 0.194101  |  |
| 10               | 7                | 0              | -0.686236               | 0.236265  | -0.601291 |  |
| 11               | 6                | 0              | -1.404322               | 1.326617  | 0.031826  |  |
| 12               | 6                | 0              | -2.462603               | 0.950367  | 1.046140  |  |
| 13               | 6                | 0              | -3.859887               | 0.659346  | 0.463630  |  |
| 14               | 6                | 0              | -3.989411               | -0.699768 | -0.186276 |  |
| 15               | 8                | 0              | -5.181857               | -0.855116 | -0.783003 |  |



|                                              |   |   |           |             |           |
|----------------------------------------------|---|---|-----------|-------------|-----------|
| 16                                           | 6 | 0 | 1.553151  | -0.599408   | 2.908999  |
| 17                                           | 6 | 0 | -1.123755 | 2.577585    | -0.371145 |
| 18                                           | 6 | 0 | -1.793232 | 3.848215    | 0.059772  |
| 19                                           | 8 | 0 | -3.140823 | -1.575219   | -0.166831 |
| 20                                           | 1 | 0 | 1.156242  | -1.619497   | 2.938077  |
| 21                                           | 1 | 0 | 4.186770  | 0.106509    | 2.532413  |
| 22                                           | 1 | 0 | 5.232209  | 0.548015    | 0.522008  |
| 23                                           | 1 | 0 | 5.554751  | 0.831588    | -1.714468 |
| 24                                           | 1 | 0 | 4.508715  | -0.257071   | -2.663305 |
| 25                                           | 1 | 0 | 4.077458  | 1.432766    | -2.511947 |
| 26                                           | 1 | 0 | -0.329835 | -0.927841   | 1.144029  |
| 27                                           | 1 | 0 | 2.241481  | -0.494322   | 3.750296  |
| 28                                           | 1 | 0 | 0.720300  | 0.090619    | 3.080439  |
| 29                                           | 1 | 0 | -1.051800 | 4.560930    | 0.439265  |
| 30                                           | 1 | 0 | -2.550961 | 3.701569    | 0.832078  |
| 31                                           | 1 | 0 | -0.336365 | 2.700358    | -1.115511 |
| 32                                           | 1 | 0 | -2.145356 | 0.080190    | 1.629788  |
| 33                                           | 1 | 0 | -2.562418 | 1.772102    | 1.758585  |
| 34                                           | 1 | 0 | -0.080656 | 0.571482    | -1.364018 |
| 35                                           | 1 | 0 | -4.163616 | 1.423092    | -0.259794 |
| 36                                           | 1 | 0 | -4.609917 | 0.692676    | 1.264268  |
| 37                                           | 1 | 0 | -5.228996 | -1.753145   | -1.155533 |
| 38                                           | 1 | 0 | -2.277425 | 4.331524    | -0.797699 |
| 39                                           | 6 | 0 | -0.358155 | -3.223398   | -0.134067 |
| 40                                           | 1 | 0 | 0.536158  | -3.586368   | 0.383921  |
| 41                                           | 1 | 0 | -1.203410 | -3.178187   | 0.553998  |
| 42                                           | 1 | 0 | -0.605001 | -3.915519   | -0.940957 |
| 43                                           | 7 | 0 | -0.143190 | -1.888900   | -0.718580 |
| 44                                           | 1 | 0 | 0.542837  | -1.889560   | -1.479574 |
| 45                                           | 1 | 0 | -1.062472 | -0.945293   | -1.038637 |
| -----                                        |   |   |           |             |           |
| Sum of electronic and zero-point Energies=   |   |   |           | -975.426650 |           |
| Sum of electronic and thermal Energies=      |   |   |           | -975.403969 |           |
| Sum of electronic and thermal Enthalpies=    |   |   |           | -975.403025 |           |
| Sum of electronic and thermal Free Energies= |   |   |           | -975.480307 |           |

**Table 29: Cartesian coordinates and energies for the structure '07TS08\_H<sub>2</sub>O'**

Standard orientation:

| -----            |                  |                |                         |           |           |  |
|------------------|------------------|----------------|-------------------------|-----------|-----------|--|
| Center<br>Number | Atomic<br>Number | Atomic<br>Type | Coordinates (Angstroms) |           |           |  |
|                  |                  |                | X                       | Y         | Z         |  |
| -----            |                  |                |                         |           |           |  |
| 1                | 6                | 0              | -1.948455               | -0.265325 | 1.738511  |  |
| 2                | 6                | 0              | -3.181443               | -0.879359 | 1.930697  |  |
| 3                | 7                | 0              | -4.060215               | -0.960059 | 0.895289  |  |
| 4                | 6                | 0              | -3.854473               | -0.495148 | -0.347593 |  |
| 5                | 6                | 0              | -2.596957               | 0.148697  | -0.627089 |  |
| 6                | 6                | 0              | -1.664779               | 0.250373  | 0.462505  |  |
| 7                | 6                | 0              | -4.901647               | -0.646840 | -1.397532 |  |

|                                              |   |   |           |              |           |
|----------------------------------------------|---|---|-----------|--------------|-----------|
| 8                                            | 8 | 0 | -2.329630 | 0.603631     | -1.787006 |
| 9                                            | 6 | 0 | -0.369640 | 0.948709     | 0.112771  |
| 10                                           | 7 | 0 | 0.379823  | 0.231264     | -0.991117 |
| 11                                           | 6 | 0 | 1.063862  | -1.008213    | -0.611251 |
| 12                                           | 6 | 0 | 0.616087  | -2.163330    | -1.125868 |
| 13                                           | 6 | 0 | 1.218869  | -3.526012    | -0.953331 |
| 14                                           | 6 | 0 | -0.984525 | -0.187364    | 2.901153  |
| 15                                           | 6 | 0 | 2.270837  | -0.824772    | 0.275995  |
| 16                                           | 6 | 0 | 3.551716  | -0.425624    | -0.480592 |
| 17                                           | 6 | 0 | 4.671577  | -0.072266    | 0.478620  |
| 18                                           | 8 | 0 | 4.530573  | 0.149283     | 1.663468  |
| 19                                           | 8 | 0 | 5.862857  | -0.008877    | -0.150830 |
| 20                                           | 7 | 0 | -0.594180 | 2.345877     | -0.387553 |
| 21                                           | 6 | 0 | -0.892126 | 3.335532     | 0.674133  |
| 22                                           | 1 | 0 | -0.740120 | 0.849160     | 3.156054  |
| 23                                           | 1 | 0 | -3.502119 | -1.307677    | 2.870362  |
| 24                                           | 1 | 0 | -4.951960 | -1.412351    | 1.078282  |
| 25                                           | 1 | 0 | -4.504337 | -1.213727    | -2.246233 |
| 26                                           | 1 | 0 | -5.796860 | -1.148947    | -1.020125 |
| 27                                           | 1 | 0 | -5.181674 | 0.335446     | -1.792545 |
| 28                                           | 1 | 0 | 0.300667  | 1.022165     | 0.968321  |
| 29                                           | 1 | 0 | -1.412599 | -0.648772    | 3.793541  |
| 30                                           | 1 | 0 | -0.046720 | -0.707324    | 2.681029  |
| 31                                           | 1 | 0 | -0.268888 | -2.123988    | -1.761978 |
| 32                                           | 1 | 0 | 2.083877  | -0.063810    | 1.040751  |
| 33                                           | 1 | 0 | 2.455713  | -1.747876    | 0.829911  |
| 34                                           | 1 | 0 | -0.328447 | 0.047102     | -1.715322 |
| 35                                           | 1 | 0 | 3.386541  | 0.458713     | -1.108247 |
| 36                                           | 1 | 0 | 3.889891  | -1.222922    | -1.149746 |
| 37                                           | 1 | 0 | 6.536684  | 0.246057     | 0.503705  |
| 38                                           | 1 | 0 | -1.761966 | 3.041093     | 1.268420  |
| 39                                           | 1 | 0 | -0.020201 | 3.441094     | 1.323913  |
| 40                                           | 1 | 0 | -1.094012 | 4.298323     | 0.201734  |
| 41                                           | 1 | 0 | -1.367085 | 2.279463     | -1.063732 |
| 42                                           | 1 | 0 | 1.525329  | -3.931196    | -1.925157 |
| 43                                           | 1 | 0 | 0.478729  | -4.223735    | -0.544316 |
| 44                                           | 1 | 0 | 1.142246  | 1.158576     | -1.463544 |
| 45                                           | 1 | 0 | 1.678808  | 2.639981     | -2.484794 |
| 46                                           | 1 | 0 | 0.491772  | 2.598285     | -1.058886 |
| 47                                           | 8 | 0 | 1.541681  | 2.307893     | -1.586516 |
| 48                                           | 1 | 0 | 2.091478  | -3.532496    | -0.297423 |
| -----                                        |   |   |           |              |           |
| Sum of electronic and zero-point Energies=   |   |   |           | -1051.866370 |           |
| Sum of electronic and thermal Energies=      |   |   |           | -1051.841783 |           |
| Sum of electronic and thermal Enthalpies=    |   |   |           | -1051.840838 |           |
| Sum of electronic and thermal Free Energies= |   |   |           | -1051.922820 |           |

**Table 30: Cartesian coordinates and energies for the structure '08a'**

Standard orientation:

| Center<br>Number                           | Atomic<br>Number | Atomic<br>Type | Coordinates (Angstroms) |             |           |
|--------------------------------------------|------------------|----------------|-------------------------|-------------|-----------|
|                                            |                  |                | X                       | Y           | Z         |
| 1                                          | 6                | 0              | -2.352737               | 0.605492    | 1.359816  |
| 2                                          | 6                | 0              | -3.627646               | 0.050245    | 1.349424  |
| 3                                          | 7                | 0              | -4.055794               | -0.626547   | 0.252268  |
| 4                                          | 6                | 0              | -3.336265               | -0.839335   | -0.863645 |
| 5                                          | 6                | 0              | -2.006549               | -0.301725   | -0.923632 |
| 6                                          | 6                | 0              | -1.549335               | 0.444858    | 0.217001  |
| 7                                          | 6                | 0              | -3.920780               | -1.600916   | -2.004857 |
| 8                                          | 8                | 0              | -1.276724               | -0.492220   | -1.958444 |
| 9                                          | 6                | 0              | -0.205100               | 1.138464    | 0.059723  |
| 10                                         | 7                | 0              | -0.205426               | 2.260161    | -0.852532 |
| 11                                         | 6                | 0              | -0.622940               | 3.551194    | -0.300807 |
| 12                                         | 6                | 0              | -1.900190               | 1.349526    | 2.597347  |
| 13                                         | 7                | 0              | 0.811459                | 0.145690    | -0.523337 |
| 14                                         | 6                | 0              | 1.346635                | -0.891591   | 0.377238  |
| 15                                         | 6                | 0              | 0.846115                | -2.130061   | 0.280362  |
| 16                                         | 6                | 0              | 1.255970                | -3.327186   | 1.083635  |
| 17                                         | 6                | 0              | 2.449974                | -0.422130   | 1.301954  |
| 18                                         | 6                | 0              | 3.886210                | -0.613974   | 0.769722  |
| 19                                         | 6                | 0              | 4.234305                | 0.245821    | -0.424519 |
| 20                                         | 8                | 0              | 3.450170                | 0.947865    | -1.046520 |
| 21                                         | 8                | 0              | 5.529974                | 0.159245    | -0.744791 |
| 22                                         | 1                | 0              | -1.671868               | 2.397675    | 2.381928  |
| 23                                         | 1                | 0              | -4.324106               | 0.124956    | 2.173406  |
| 24                                         | 1                | 0              | -4.998536               | -1.004917   | 0.275316  |
| 25                                         | 1                | 0              | -4.940083               | -1.938554   | -1.796807 |
| 26                                         | 1                | 0              | -3.927385               | -0.980873   | -2.907560 |
| 27                                         | 1                | 0              | -3.296545               | -2.470107   | -2.237323 |
| 28                                         | 1                | 0              | 0.187119                | 1.476864    | 1.020095  |
| 29                                         | 1                | 0              | -2.677657               | 1.335692    | 3.364297  |
| 30                                         | 1                | 0              | -1.004124               | 0.894424    | 3.032663  |
| 31                                         | 1                | 0              | 0.384279                | -3.767798   | 1.581309  |
| 32                                         | 1                | 0              | 2.006934                | -3.105047   | 1.844341  |
| 33                                         | 1                | 0              | 0.073594                | -2.303811   | -0.467175 |
| 34                                         | 1                | 0              | 2.305116                | 0.635320    | 1.551280  |
| 35                                         | 1                | 0              | 2.376498                | -0.967964   | 2.246118  |
| 36                                         | 1                | 0              | 0.258244                | -0.267655   | -1.330037 |
| 37                                         | 1                | 0              | 4.064285                | -1.658347   | 0.486976  |
| 38                                         | 1                | 0              | 4.611645                | -0.391432   | 1.560432  |
| 39                                         | 1                | 0              | 5.699267                | 0.720994    | -1.522319 |
| 40                                         | 1                | 0              | 1.661097                | -4.103638   | 0.423704  |
| 41                                         | 1                | 0              | -1.661454               | 3.571989    | 0.062728  |
| 42                                         | 1                | 0              | 0.044401                | 3.831360    | 0.520388  |
| 43                                         | 1                | 0              | -0.519971               | 4.307418    | -1.081868 |
| 44                                         | 1                | 0              | -0.718886               | 2.031213    | -1.700838 |
| 45                                         | 1                | 0              | 1.603106                | 0.705906    | -0.890377 |
| Sum of electronic and zero-point Energies= |                  |                |                         | -975.462935 |           |
| Sum of electronic and thermal Energies=    |                  |                |                         | -975.440115 |           |

Sum of electronic and thermal Enthalpies= -975.439171  
Sum of electronic and thermal Free Energies= -975.516330

**Table 31: Cartesian coordinates and energies for the structure '08b'**

Standard orientation:

| Center<br>Number | Atomic<br>Number | Atomic<br>Type | Coordinates (Angstroms) |           |           |
|------------------|------------------|----------------|-------------------------|-----------|-----------|
|                  |                  |                | X                       | Y         | Z         |
| 1                | 6                | 0              | -1.674145               | 0.521683  | 0.154036  |
| 2                | 6                | 0              | -2.605741               | 0.913819  | 1.133027  |
| 3                | 6                | 0              | -3.892713               | 0.396940  | 1.066076  |
| 4                | 7                | 0              | -4.217772               | -0.459391 | 0.062735  |
| 5                | 6                | 0              | -3.383469               | -0.876161 | -0.903828 |
| 6                | 6                | 0              | -2.034857               | -0.380905 | -0.901416 |
| 7                | 6                | 0              | -2.269943               | 1.894720  | 2.230659  |
| 8                | 6                | 0              | -3.863103               | -1.808799 | -1.963989 |
| 9                | 8                | 0              | -1.221293               | -0.759226 | -1.819889 |
| 10               | 6                | 0              | -0.287885               | 1.149561  | 0.134714  |
| 11               | 7                | 0              | -0.292472               | 2.350483  | -0.619088 |
| 12               | 6                | 0              | 0.873371                | 3.235429  | -0.564309 |
| 13               | 7                | 0              | 0.736718                | 0.081606  | -0.408123 |
| 14               | 6                | 0              | 1.285972                | -0.860416 | 0.580279  |
| 15               | 6                | 0              | 2.462060                | -0.334117 | 1.376483  |
| 16               | 6                | 0              | 3.852615                | -0.654971 | 0.788516  |
| 17               | 6                | 0              | 4.165026                | 0.044120  | -0.514894 |
| 18               | 8                | 0              | 5.423119                | -0.171682 | -0.911761 |
| 19               | 6                | 0              | 0.728657                | -2.075042 | 0.679628  |
| 20               | 6                | 0              | 1.130666                | -3.174465 | 1.616005  |
| 21               | 8                | 0              | 3.385151                | 0.735566  | -1.156248 |
| 22               | 1                | 0              | -1.914508               | 2.840292  | 1.809915  |
| 23               | 1                | 0              | -4.678652               | 0.643279  | 1.766866  |
| 24               | 1                | 0              | -5.171319               | -0.809529 | 0.036489  |
| 25               | 1                | 0              | -4.897291               | -2.123868 | -1.798895 |
| 26               | 1                | 0              | -3.787839               | -1.332683 | -2.947631 |
| 27               | 1                | 0              | -3.219667               | -2.693560 | -2.004552 |
| 28               | 1                | 0              | 0.058858                | 1.368560  | 1.148170  |
| 29               | 1                | 0              | -3.145287               | 2.107069  | 2.848140  |
| 30               | 1                | 0              | -1.488256               | 1.504522  | 2.892185  |
| 31               | 1                | 0              | 0.268312                | -3.506584 | 2.205755  |
| 32               | 1                | 0              | 1.926075                | -2.890427 | 2.308126  |
| 33               | 1                | 0              | -0.089985               | -2.307758 | 0.000927  |
| 34               | 1                | 0              | 2.372685                | 0.751162  | 1.502194  |
| 35               | 1                | 0              | 2.429556                | -0.757808 | 2.383534  |
| 36               | 1                | 0              | 0.149778                | -0.407903 | -1.170428 |
| 37               | 1                | 0              | 3.968779                | -1.732149 | 0.620286  |
| 38               | 1                | 0              | 4.636330                | -0.379647 | 1.503825  |
| 39               | 1                | 0              | 5.571691                | 0.290117  | -1.756345 |
| 40               | 1                | 0              | 1.472479                | -4.048190 | 1.048103  |

|                                              |   |   |           |          |             |
|----------------------------------------------|---|---|-----------|----------|-------------|
| 41                                           | 1 | 0 | 0.628741  | 4.163053 | -1.085906   |
| 42                                           | 1 | 0 | 1.083267  | 3.489110 | 0.480159    |
| 43                                           | 1 | 0 | 1.785345  | 2.818031 | -1.012719   |
| 44                                           | 1 | 0 | -0.691225 | 2.246158 | -1.545896   |
| 45                                           | 1 | 0 | 1.531923  | 0.574222 | -0.843703   |
| -----                                        |   |   |           |          |             |
| Sum of electronic and zero-point Energies=   |   |   |           |          | -975.466396 |
| Sum of electronic and thermal Energies=      |   |   |           |          | -975.443564 |
| Sum of electronic and thermal Enthalpies=    |   |   |           |          | -975.442620 |
| Sum of electronic and thermal Free Energies= |   |   |           |          | -975.519425 |

**Table 32: Cartesian coordinates and energies for the structure '08TS09'**

Standard orientation:

| Center<br>Number | Atomic<br>Number | Atomic<br>Type | Coordinates (Angstroms) |           |           |
|------------------|------------------|----------------|-------------------------|-----------|-----------|
|                  |                  |                | X                       | Y         | Z         |
| 1                | 6                | 0              | -2.213006               | -0.044803 | 1.607069  |
| 2                | 6                | 0              | -3.423147               | -0.703996 | 1.435248  |
| 3                | 7                | 0              | -3.994129               | -0.745822 | 0.199840  |
| 4                | 6                | 0              | -3.482132               | -0.210274 | -0.917615 |
| 5                | 6                | 0              | -2.219976               | 0.487855  | -0.826958 |
| 6                | 6                | 0              | -1.624454               | 0.566248  | 0.483658  |
| 7                | 6                | 0              | -4.209120               | -0.323285 | -2.213662 |
| 8                | 8                | 0              | -1.679305               | 0.986083  | -1.859153 |
| 9                | 6                | 0              | -0.367349               | 1.344970  | 0.595940  |
| 10               | 7                | 0              | -0.330052               | 2.576347  | 0.052038  |
| 11               | 6                | 0              | 0.762887                | 3.516822  | 0.285164  |
| 12               | 6                | 0              | -1.607348               | 0.010677  | 2.991061  |
| 13               | 7                | 0              | 0.840334                | 0.242686  | -0.503517 |
| 14               | 6                | 0              | 1.201298                | -1.090955 | -0.115572 |
| 15               | 6                | 0              | 0.532473                | -2.140001 | -0.627911 |
| 16               | 6                | 0              | 0.744548                | -3.594461 | -0.327362 |
| 17               | 6                | 0              | 2.329049                | -1.164734 | 0.894550  |
| 18               | 6                | 0              | 3.755579                | -1.185166 | 0.304392  |
| 19               | 6                | 0              | 4.232208                | 0.129981  | -0.271644 |
| 20               | 8                | 0              | 3.550089                | 1.134344  | -0.422873 |
| 21               | 8                | 0              | 5.526419                | 0.086691  | -0.609133 |
| 22               | 1                | 0              | -1.516776               | 1.041978  | 3.347652  |
| 23               | 1                | 0              | -3.966390               | -1.187946 | 2.234981  |
| 24               | 1                | 0              | -4.887689               | -1.223311 | 0.117526  |
| 25               | 1                | 0              | -5.139304               | -0.890553 | -2.118525 |
| 26               | 1                | 0              | -4.436554               | 0.674365  | -2.604545 |
| 27               | 1                | 0              | -3.569905               | -0.803135 | -2.962246 |
| 28               | 1                | 0              | 0.187062                | 1.252920  | 1.525173  |
| 29               | 1                | 0              | -2.226258               | -0.531855 | 3.708900  |
| 30               | 1                | 0              | -0.610248               | -0.441691 | 3.011633  |
| 31               | 1                | 0              | -0.192628               | -4.063983 | -0.004786 |
| 32               | 1                | 0              | 1.493716                | -3.773923 | 0.446789  |

|                                              |   |   |           |           |             |
|----------------------------------------------|---|---|-----------|-----------|-------------|
| 33                                           | 1 | 0 | -0.239165 | -1.923803 | -1.366630   |
| 34                                           | 1 | 0 | 2.250599  | -0.325629 | 1.596424    |
| 35                                           | 1 | 0 | 2.213619  | -2.072571 | 1.490440    |
| 36                                           | 1 | 0 | 0.285755  | 0.294208  | -1.364518   |
| 37                                           | 1 | 0 | 3.843612  | -1.942011 | -0.484397   |
| 38                                           | 1 | 0 | 4.476403  | -1.477638 | 1.076581    |
| 39                                           | 1 | 0 | 5.782892  | 0.948396  | -0.983234   |
| 40                                           | 1 | 0 | 1.063874  | -4.129771 | -1.230015   |
| 41                                           | 1 | 0 | 0.401008  | 4.530777  | 0.105060    |
| 42                                           | 1 | 0 | 1.089446  | 3.447903  | 1.325988    |
| 43                                           | 1 | 0 | 1.623874  | 3.328026  | -0.367279   |
| 44                                           | 1 | 0 | -0.865389 | 2.676882  | -0.807779   |
| 45                                           | 1 | 0 | 1.678683  | 0.829684  | -0.580591   |
| -----                                        |   |   |           |           |             |
| Sum of electronic and zero-point Energies=   |   |   |           |           | -975.461243 |
| Sum of electronic and thermal Energies=      |   |   |           |           | -975.438173 |
| Sum of electronic and thermal Enthalpies=    |   |   |           |           | -975.437228 |
| Sum of electronic and thermal Free Energies= |   |   |           |           | -975.515322 |

**Table 33: Cartesian coordinates and energies for the structure '09'**

Standard orientation:

| -----            |                  |                |                         |           |           |  |
|------------------|------------------|----------------|-------------------------|-----------|-----------|--|
| Center<br>Number | Atomic<br>Number | Atomic<br>Type | Coordinates (Angstroms) |           |           |  |
|                  |                  |                | X                       | Y         | Z         |  |
| -----            |                  |                |                         |           |           |  |
| 1                | 6                | 0              | 4.389430                | -0.760538 | -0.388117 |  |
| 2                | 6                | 0              | 5.258347                | 0.264998  | -0.093354 |  |
| 3                | 7                | 0              | 4.766980                | 1.493129  | 0.280275  |  |
| 4                | 6                | 0              | 3.483703                | 1.816432  | 0.397008  |  |
| 5                | 6                | 0              | 2.481382                | 0.789704  | 0.104958  |  |
| 6                | 6                | 0              | 2.985287                | -0.511773 | -0.295904 |  |
| 7                | 6                | 0              | 3.071962                | 3.184872  | 0.809270  |  |
| 8                | 8                | 0              | 1.268126                | 1.071891  | 0.208820  |  |
| 9                | 6                | 0              | 2.059532                | -1.559857 | -0.599501 |  |
| 10               | 7                | 0              | 0.758309                | -1.479148 | -0.579422 |  |
| 11               | 6                | 0              | -0.129217               | -2.595391 | -0.893805 |  |
| 12               | 6                | 0              | 4.963818                | -2.096546 | -0.796450 |  |
| 13               | 1                | 0              | 4.642855                | -2.381886 | -1.803825 |  |
| 14               | 1                | 0              | 6.334867                | 0.177766  | -0.134734 |  |
| 15               | 1                | 0              | 5.450722                | 2.218422  | 0.484473  |  |
| 16               | 1                | 0              | 3.929096                | 3.839557  | 0.986654  |  |
| 17               | 1                | 0              | 2.431017                | 3.627132  | 0.038979  |  |
| 18               | 1                | 0              | 2.462723                | 3.131520  | 1.717968  |  |
| 19               | 1                | 0              | 2.460284                | -2.531044 | -0.879125 |  |
| 20               | 1                | 0              | 6.054939                | -2.062697 | -0.799112 |  |
| 21               | 1                | 0              | 4.662849                | -2.891926 | -0.106375 |  |
| 22               | 1                | 0              | -0.763597               | -2.318858 | -1.739387 |  |
| 23               | 1                | 0              | 0.453850                | -3.484386 | -1.139991 |  |
| 24               | 1                | 0              | -0.769077               | -2.792081 | -0.030048 |  |

|    |   |   |           |           |           |
|----|---|---|-----------|-----------|-----------|
| 25 | 1 | 0 | 0.278842  | -0.591003 | -0.330167 |
| 26 | 1 | 0 | -1.546178 | 0.038863  | 2.592529  |
| 27 | 6 | 0 | -3.276062 | -1.204143 | 3.152462  |
| 28 | 1 | 0 | -4.076863 | -1.780247 | 2.681299  |
| 29 | 1 | 0 | -2.691946 | -1.896826 | 3.771736  |
| 30 | 1 | 0 | -3.750003 | -0.495460 | 3.843998  |
| 31 | 6 | 0 | -2.398346 | -0.489696 | 2.161750  |
| 32 | 6 | 0 | -2.555767 | -0.407939 | 0.825530  |
| 33 | 7 | 0 | -1.602245 | 0.260115  | 0.003676  |
| 34 | 1 | 0 | -2.044699 | 0.692567  | -0.806551 |
| 35 | 1 | 0 | -1.066424 | 0.960714  | 0.508550  |
| 36 | 6 | 0 | -3.694641 | -1.051186 | 0.055653  |
| 37 | 1 | 0 | -4.023921 | -1.951385 | 0.580090  |
| 38 | 1 | 0 | -3.330614 | -1.374825 | -0.926522 |
| 39 | 6 | 0 | -4.937770 | -0.161690 | -0.147158 |
| 40 | 1 | 0 | -5.789360 | -0.772257 | -0.472340 |
| 41 | 1 | 0 | -5.249707 | 0.302775  | 0.795256  |
| 42 | 6 | 0 | -4.776950 | 0.936898  | -1.174515 |
| 43 | 8 | 0 | -3.771625 | 1.174974  | -1.821777 |
| 44 | 8 | 0 | -5.910836 | 1.648292  | -1.321399 |
| 45 | 1 | 0 | -5.754525 | 2.330778  | -1.997174 |

-----  
 Sum of electronic and zero-point Energies= -975.476673  
 Sum of electronic and thermal Energies= -975.453106  
 Sum of electronic and thermal Enthalpies= -975.452162  
 Sum of electronic and thermal Free Energies= -975.533038

**Table 34: Cartesian coordinates and energies for the structure '09TS10'**

Standard orientation:

| Center<br>Number | Atomic<br>Number | Atomic<br>Type | Coordinates (Angstroms) |           |           |
|------------------|------------------|----------------|-------------------------|-----------|-----------|
|                  |                  |                | X                       | Y         | Z         |
| 1                | 6                | 0              | -3.189034               | -1.048874 | -0.463282 |
| 2                | 6                | 0              | -4.230021               | -0.283072 | -0.965714 |
| 3                | 7                | 0              | -4.200256               | 1.070022  | -0.825244 |
| 4                | 6                | 0              | -3.219756               | 1.768051  | -0.230924 |
| 5                | 6                | 0              | -2.095603               | 1.049333  | 0.309436  |
| 6                | 6                | 0              | -2.118749               | -0.387400 | 0.180288  |
| 7                | 6                | 0              | -3.302712               | 3.253814  | -0.139175 |
| 8                | 8                | 0              | -1.139781               | 1.689531  | 0.857664  |
| 9                | 6                | 0              | -1.004714               | -1.150458 | 0.777639  |
| 10               | 7                | 0              | -0.538430               | -0.772800 | 1.978784  |
| 11               | 6                | 0              | 0.351145                | -1.614642 | 2.761784  |
| 12               | 6                | 0              | -3.278838               | -2.553607 | -0.585759 |
| 13               | 1                | 0              | -3.326955               | -3.028359 | 0.400158  |
| 14               | 1                | 0              | -5.098416               | -0.697787 | -1.458853 |
| 15               | 1                | 0              | -4.985805               | 1.595745  | -1.198031 |
| 16               | 1                | 0              | -4.217669               | 3.644667  | -0.593250 |

|    |   |   |           |           |           |
|----|---|---|-----------|-----------|-----------|
| 17 | 1 | 0 | -3.260348 | 3.567997  | 0.908924  |
| 18 | 1 | 0 | -2.436408 | 3.709901  | -0.629899 |
| 19 | 1 | 0 | -0.974501 | -2.220533 | 0.599477  |
| 20 | 1 | 0 | -4.176822 | -2.844849 | -1.134874 |
| 21 | 1 | 0 | -2.420264 | -2.975542 | -1.116349 |
| 22 | 1 | 0 | 0.560781  | -1.125685 | 3.713628  |
| 23 | 1 | 0 | -0.118755 | -2.582717 | 2.961691  |
| 24 | 1 | 0 | 1.299692  | -1.787853 | 2.238892  |
| 25 | 1 | 0 | -0.614725 | 0.217981  | 2.195963  |
| 26 | 1 | 0 | -0.103666 | 0.030216  | -1.176784 |
| 27 | 6 | 0 | 0.567639  | -1.991984 | -1.725791 |
| 28 | 1 | 0 | 0.893167  | -2.901186 | -1.208648 |
| 29 | 1 | 0 | -0.427329 | -2.189231 | -2.134722 |
| 30 | 1 | 0 | 1.231735  | -1.850785 | -2.588476 |
| 31 | 6 | 0 | 0.526701  | -0.778199 | -0.822081 |
| 32 | 6 | 0 | 1.649399  | -0.329248 | -0.095455 |
| 33 | 7 | 0 | 1.563833  | 0.786608  | 0.630241  |
| 34 | 1 | 0 | 2.408662  | 1.169199  | 1.048089  |
| 35 | 1 | 0 | 0.689416  | 1.325230  | 0.642874  |
| 36 | 6 | 0 | 2.965591  | -1.083730 | -0.041921 |
| 37 | 1 | 0 | 2.798438  | -2.115030 | -0.356142 |
| 38 | 1 | 0 | 3.339781  | -1.110145 | 0.986306  |
| 39 | 6 | 0 | 4.064201  | -0.481614 | -0.944735 |
| 40 | 1 | 0 | 4.852902  | -1.223543 | -1.112109 |
| 41 | 1 | 0 | 3.682321  | -0.225146 | -1.939963 |
| 42 | 6 | 0 | 4.725642  | 0.751287  | -0.361394 |
| 43 | 8 | 0 | 4.401744  | 1.303015  | 0.676270  |
| 44 | 8 | 0 | 5.741364  | 1.176256  | -1.126723 |
| 45 | 1 | 0 | 6.136771  | 1.962275  | -0.709555 |

-----  
 Sum of electronic and zero-point Energies= -975.461441  
 Sum of electronic and thermal Energies= -975.438612  
 Sum of electronic and thermal Enthalpies= -975.437668  
 Sum of electronic and thermal Free Energies= -975.513735  
 -----

**Table 35: Cartesian coordinates and energies for the structure '10'**

Standard orientation:

| Center<br>Number | Atomic<br>Number | Atomic<br>Type | Coordinates (Angstroms) |           |           |
|------------------|------------------|----------------|-------------------------|-----------|-----------|
|                  |                  |                | X                       | Y         | Z         |
| 1                | 6                | 0              | -3.250105               | -0.875683 | -0.517818 |
| 2                | 6                | 0              | -4.309638               | -0.017606 | -0.784959 |
| 3                | 7                | 0              | -4.168179               | 1.311993  | -0.559461 |
| 4                | 6                | 0              | -3.056453               | 1.899929  | -0.082931 |
| 5                | 6                | 0              | -1.925214               | 1.075592  | 0.218833  |
| 6                | 6                | 0              | -2.047272               | -0.332392 | -0.024061 |
| 7                | 6                | 0              | -3.028679               | 3.374858  | 0.140671  |
| 8                | 8                | 0              | -0.872643               | 1.637194  | 0.701637  |



|                                              |   |   |           |             |           |
|----------------------------------------------|---|---|-----------|-------------|-----------|
| 9                                            | 6 | 0 | -0.865538 | -1.220312   | 0.339600  |
| 10                                           | 7 | 0 | -0.677988 | -1.199789   | 1.764547  |
| 11                                           | 6 | 0 | 0.215166  | -2.192315   | 2.332162  |
| 12                                           | 6 | 0 | -3.461202 | -2.356155   | -0.744522 |
| 13                                           | 1 | 0 | -3.337027 | -2.919856   | 0.185657  |
| 14                                           | 1 | 0 | -5.269809 | -0.345383   | -1.159661 |
| 15                                           | 1 | 0 | -4.964133 | 1.910922    | -0.758009 |
| 16                                           | 1 | 0 | -3.963171 | 3.854394    | -0.164623 |
| 17                                           | 1 | 0 | -2.846036 | 3.592321    | 1.198351  |
| 18                                           | 1 | 0 | -2.198546 | 3.824779    | -0.413219 |
| 19                                           | 1 | 0 | -1.106556 | -2.255042   | 0.084236  |
| 20                                           | 1 | 0 | -4.469545 | -2.551624   | -1.116396 |
| 21                                           | 1 | 0 | -2.758405 | -2.762290   | -1.478950 |
| 22                                           | 1 | 0 | 0.248263  | -2.072146   | 3.417424  |
| 23                                           | 1 | 0 | -0.161397 | -3.198428   | 2.115886  |
| 24                                           | 1 | 0 | 1.253476  | -2.139216   | 1.956706  |
| 25                                           | 1 | 0 | -0.570128 | -0.269378   | 2.150979  |
| 26                                           | 1 | 0 | 0.092685  | -0.031136   | -1.240182 |
| 27                                           | 6 | 0 | 0.642928  | -2.069243   | -1.610909 |
| 28                                           | 1 | 0 | 0.891130  | -2.995858   | -1.082714 |
| 29                                           | 1 | 0 | -0.271822 | -2.254893   | -2.181012 |
| 30                                           | 1 | 0 | 1.433126  | -1.863801   | -2.339513 |
| 31                                           | 6 | 0 | 0.413190  | -0.896579   | -0.648876 |
| 32                                           | 6 | 0 | 1.644314  | -0.411897   | 0.072486  |
| 33                                           | 7 | 0 | 1.519800  | 0.669914    | 0.769939  |
| 34                                           | 1 | 0 | 2.352731  | 1.068380    | 1.209593  |
| 35                                           | 1 | 0 | 0.555141  | 1.150314    | 0.789471  |
| 36                                           | 6 | 0 | 2.994992  | -1.093269   | -0.004596 |
| 37                                           | 1 | 0 | 2.867178  | -2.115644   | -0.359116 |
| 38                                           | 1 | 0 | 3.418702  | -1.145934   | 1.002967  |
| 39                                           | 6 | 0 | 4.011155  | -0.377547   | -0.924057 |
| 40                                           | 1 | 0 | 4.829191  | -1.065471   | -1.162796 |
| 41                                           | 1 | 0 | 3.573335  | -0.093097   | -1.888174 |
| 42                                           | 6 | 0 | 4.623573  | 0.861387    | -0.298804 |
| 43                                           | 8 | 0 | 4.287539  | 1.349320    | 0.767031  |
| 44                                           | 8 | 0 | 5.599363  | 1.367729    | -1.061539 |
| 45                                           | 1 | 0 | 5.964825  | 2.156701    | -0.622430 |
| -----                                        |   |   |           |             |           |
| Sum of electronic and zero-point Energies=   |   |   |           | -975.471971 |           |
| Sum of electronic and thermal Energies=      |   |   |           | -975.449764 |           |
| Sum of electronic and thermal Enthalpies=    |   |   |           | -975.448820 |           |
| Sum of electronic and thermal Free Energies= |   |   |           | -975.523281 |           |

Table 36: NBO charges on heavy atoms

|                      | C1     | C2    | C3    | C4     | C5     | C6     | O7     | C8     | N9     | C10    | C11    | C12    | C13    | C14    | C15    | C16   | O17    | O18    | N19    |
|----------------------|--------|-------|-------|--------|--------|--------|--------|--------|--------|--------|--------|--------|--------|--------|--------|-------|--------|--------|--------|
| EP01 + V01           | -0.203 | 0.412 | 0.263 | -0.459 | -0.054 | 0.016  | -0.638 | 0.172  | -0.496 | -0.504 | -0.443 | -0.214 | -0.124 | -0.481 | -0.574 | 0.817 | -0.611 | -0.731 | -0.913 |
| pre-reaction complex | -0.21  | 0.413 | 0.262 | -0.468 | -0.046 | 0.01   | -0.647 | 0.17   | -0.507 | -0.502 | -0.429 | -0.257 | -0.126 | -0.47  | -0.579 | 0.862 | -0.689 | -0.693 | -0.915 |
| 00TS01               | -0.155 | 0.373 | 0.217 | -0.457 | -0.034 | -0.027 | -0.722 | 0.168  | -0.608 | -0.502 | -0.400 | -0.270 | -0.103 | -0.487 | -0.568 | 0.821 | -0.624 | -0.711 | -0.779 |
| 01                   | -0.090 | 0.346 | 0.220 | -0.462 | -0.015 | -0.021 | -0.722 | 0.109  | -0.708 | -0.503 | -0.390 | -0.276 | -0.092 | -0.493 | -0.570 | 0.818 | -0.614 | -0.713 | -0.708 |
| 01TS02               | -0.144 | 0.367 | 0.209 | -0.462 | -0.036 | -0.025 | -0.734 | 0.109  | -0.725 | -0.496 | -0.393 | -0.260 | -0.091 | -0.484 | -0.570 | 0.819 | -0.622 | -0.709 | -0.718 |
| 01TS02_H2O           | -0.132 | 0.354 | 0.209 | -0.452 | -0.027 | -0.036 | -0.735 | 0.116  | -0.729 | -0.498 | -0.391 | -0.268 | -0.090 | -0.486 | -0.570 | 0.817 | -0.619 | -0.711 | -0.727 |
| 02a                  | -0.120 | 0.347 | 0.209 | -0.463 | -0.017 | -0.034 | -0.727 | 0.114  | -0.656 | -0.503 | -0.418 | -0.237 | -0.097 | -0.483 | -0.571 | 0.820 | -0.628 | -0.709 | -0.710 |
| 02b                  | -0.105 | 0.352 | 0.218 | -0.463 | -0.027 | -0.022 | -0.722 | 0.114  | -0.713 | -0.502 | -0.436 | -0.273 | -0.106 | -0.478 | -0.572 | 0.814 | -0.602 | -0.721 | -0.697 |
| 02TS03               | -0.158 | 0.378 | 0.217 | -0.463 | -0.045 | -0.022 | -0.710 | 0.173  | -0.803 | -0.504 | -0.432 | -0.257 | -0.102 | -0.482 | -0.574 | 0.815 | -0.600 | -0.720 | -0.590 |
| 03a                  | -0.200 | 0.410 | 0.259 | -0.459 | -0.054 | 0.014  | -0.639 | 0.178  | -0.395 | -0.499 | -0.395 | -0.261 | -0.101 | -0.484 | -0.574 | 0.815 | -0.602 | -0.718 | -0.482 |
| 03TS04               | -0.189 | 0.401 | 0.239 | -0.464 | -0.055 | -0.002 | -0.658 | 0.138  | -0.721 | -0.499 | -0.286 | -0.260 | -0.088 | -0.479 | -0.567 | 0.814 | -0.602 | -0.725 | -0.482 |
| 03TS04_H2O           | -0.190 | 0.400 | 0.240 | -0.464 | -0.054 | -0.003 | -0.657 | 0.131  | -0.693 | -0.497 | -0.279 | -0.249 | -0.079 | -0.479 | -0.572 | 0.815 | -0.604 | -0.723 | -0.480 |
| 04                   | -0.200 | 0.411 | 0.258 | -0.458 | -0.053 | 0.012  | -0.645 | 0.177  | -0.719 | -0.495 | -0.268 | -0.249 | -0.072 | -0.483 | -0.572 | 0.815 | -0.602 | -0.717 | -0.487 |
| 04_H2O               | -0.201 | 0.408 | 0.25  | -0.459 | -0.058 | 0.02   | -0.651 | 0.178  | -0.749 | -0.499 | -0.275 | -0.249 | -0.087 | -0.485 | -0.57  | 0.815 | -0.599 | -0.72  | -0.497 |
| 03r03                | -0.202 | 0.411 | 0.260 | -0.459 | -0.056 | 0.017  | -0.634 | 0.182  | -0.387 | -0.499 | -0.387 | -0.265 | -0.107 | -0.499 | -0.570 | 0.817 | -0.610 | -0.713 | -0.494 |
| 03b                  | -0.207 | 0.410 | 0.257 | -0.459 | -0.055 | 0.016  | -0.639 | 0.183  | -0.681 | -0.159 | -0.101 | -0.222 | -0.033 | -0.52  | -0.561 | 0.816 | -0.602 | -0.72  | -0.489 |
| 03TS05               | -0.155 | 0.374 | 0.212 | -0.472 | -0.035 | -0.019 | -0.696 | 0.059  | -0.641 | -0.499 | -0.641 | -0.222 | -0.033 | -0.52  | -0.561 | 0.816 | -0.602 | -0.72  | -0.489 |
| 03TS05_2H2O          | -0.143 | 0.365 | 0.197 | -0.478 | -0.031 | -0.03  | -0.712 | 0.02   | -0.739 | -0.144 | -0.144 | -0.144 | 0.138  | -0.525 | -0.566 | 0.818 | -0.609 | -0.713 | -0.486 |
| 05a                  | -0.189 | 0.402 | 0.247 | -0.462 | -0.048 | 0.007  | -0.654 | 0.143  | -0.702 | -0.498 | -0.716 | -0.088 | -0.109 | -0.508 | -0.564 | 0.816 | -0.599 | -0.719 | -0.470 |
| 05TS06               | -0.152 | 0.375 | 0.209 | -0.472 | -0.036 | -0.020 | -0.699 | 0.069  | -0.688 | -0.496 | -0.720 | -0.083 | -0.149 | -0.508 | -0.566 | 0.817 | -0.598 | -0.721 | -0.468 |
| 05TS06_H2O           | -0.160 | 0.379 | 0.216 | -0.470 | -0.040 | -0.017 | -0.688 | 0.082  | -0.688 | -0.496 | -0.720 | -0.083 | -0.149 | -0.508 | -0.566 | 0.817 | -0.598 | -0.721 | -0.468 |
| 06                   | -0.204 | 0.408 | 0.255 | -0.458 | -0.054 | 0.013  | -0.647 | 0.183  | -0.728 | -0.493 | -0.718 | -0.084 | -0.078 | -0.508 | -0.563 | 0.816 | -0.611 | -0.716 | -0.490 |
| 05br05a              | -0.189 | 0.402 | 0.246 | -0.462 | -0.048 | 0.007  | -0.654 | 0.146  | -0.741 | -0.144 | -0.144 | -0.144 | 0.137  | -0.525 | -0.565 | 0.818 | -0.611 | -0.712 | -0.484 |
| 05b                  | -0.183 | 0.402 | 0.243 | -0.462 | -0.051 | 0.011  | -0.658 | 0.149  | -0.743 | -0.148 | -0.148 | -0.148 | 0.125  | -0.516 | -0.570 | 0.828 | -0.647 | -0.702 | -0.485 |
| 05TS07               | -0.148 | 0.379 | 0.214 | -0.464 | -0.047 | -0.025 | -0.707 | 0.153  | -0.789 | -0.502 | -0.735 | -0.222 | 0.133  | -0.509 | -0.569 | 0.843 | -0.674 | -0.698 | -0.587 |
| 07                   | -0.111 | 0.354 | 0.212 | -0.464 | -0.034 | -0.026 | -0.727 | 0.114  | -0.696 | -0.499 | -0.733 | -0.262 | 0.135  | -0.508 | -0.571 | 0.849 | -0.684 | -0.696 | -0.677 |
| 07TS08               | -0.138 | 0.371 | 0.209 | -0.465 | -0.044 | -0.026 | -0.728 | 0.113  | -0.718 | -0.494 | -0.735 | -0.190 | 0.122  | -0.507 | -0.570 | 0.829 | -0.651 | -0.701 | -0.720 |
| 07TS08_H2O           | -0.131 | 0.357 | 0.21  | -0.463 | -0.036 | -0.029 | -0.734 | 0.116  | -0.73  | -0.498 | -0.732 | -0.203 | 0.131  | -0.513 | -0.566 | 0.814 | -0.608 | -0.715 | -0.722 |
| 08a                  | -0.114 | 0.353 | 0.203 | -0.466 | -0.030 | -0.039 | -0.728 | 0.117  | -0.711 | -0.497 | -0.736 | -0.182 | 0.114  | -0.515 | -0.569 | 0.834 | -0.643 | -0.696 | -0.696 |
| 08b                  | -0.094 | 0.348 | 0.210 | -0.465 | -0.029 | -0.023 | -0.724 | 0.116  | -0.704 | -0.506 | -0.735 | -0.184 | 0.111  | -0.515 | -0.570 | 0.839 | -0.655 | -0.694 | -0.719 |
| 08TS09               | -0.142 | 0.373 | 0.207 | -0.463 | -0.043 | -0.021 | -0.717 | 0.151  | -0.610 | -0.501 | -0.731 | -0.217 | 0.125  | -0.508 | -0.572 | 0.837 | -0.654 | -0.696 | -0.781 |
| 09                   | -0.206 | 0.419 | 0.255 | -0.459 | -0.063 | 0.014  | -0.643 | 0.171  | -0.484 | -0.499 | -0.721 | -0.297 | 0.139  | -0.506 | -0.569 | 0.827 | -0.64  | -0.71  | -0.915 |
| 09TS10               | -0.128 | 0.372 | 0.210 | -0.467 | -0.034 | -0.030 | -0.738 | 0.080  | -0.586 | -0.494 | -0.720 | -0.376 | 0.299  | -0.522 | -0.568 | 0.827 | -0.635 | -0.703 | -0.774 |
| 10                   | -0.053 | 0.363 | 0.204 | -0.467 | -0.022 | -0.038 | -0.761 | -0.058 | -0.696 | -0.489 | -0.706 | -0.365 | 0.435  | -0.545 | -0.567 | 0.827 | -0.634 | -0.698 | -0.700 |

**Table 37:** NBO charges on oxygen and hydrogen atoms of water molecules

|                      | H <sub>M4</sub> | H <sub>C8</sub> | H <sub>1N9</sub> | H <sub>2N9</sub> | H <sub>3C11</sub> | H <sub>2C12</sub> | H <sub>3C13</sub> | H <sub>1N19</sub> | H <sub>2N19</sub> | O <sub>W</sub> | H <sub>1W</sub> | H <sub>2W</sub> |
|----------------------|-----------------|-----------------|------------------|------------------|-------------------|-------------------|-------------------|-------------------|-------------------|----------------|-----------------|-----------------|
| EP01 + V01           | 0.471           | 0.251           | 0.494            |                  |                   |                   | 0.237             | 0.39              | 0.396             |                |                 |                 |
| pre-reaction complex | 0.495           | 0.247           | 0.493            |                  |                   |                   | 0.245             | 0.41              | 0.39              |                |                 |                 |
| 00TS01               | 0.466           | 0.263           | 0.466            |                  |                   |                   | 0.246             | 0.438             | 0.462             |                |                 |                 |
| 01                   | 0.467           | 0.26            | 0.425            |                  |                   |                   | 0.251             | 0.497             | 0.456             |                |                 |                 |
| 01TS02               | 0.465           | 0.271           | 0.478            |                  |                   |                   | 0.25              | 0.473             | 0.496             |                |                 |                 |
| 01TS02_H2O           | 0.465           | 0.27            | 0.47             |                  |                   |                   | 0.254             | 0.47              | 0.515             | -1.037         | 0.536           | 0.514           |
| 02a                  | 0.467           | 0.265           | 0.504            | 0.473            |                   |                   | 0.239             | 0.429             |                   |                |                 |                 |
| 02b                  | 0.467           | 0.261           | 0.499            | 0.467            |                   |                   | 0.245             | 0.428             |                   |                |                 |                 |
| 02TS03               | 0.466           | 0.263           | 0.453            | 0.441            |                   |                   | 0.249             | 0.47              |                   |                |                 |                 |
| 03a                  | 0.47            | 0.248           |                  |                  |                   |                   | 0.248             | 0.49              |                   |                |                 |                 |
| 03TS04               | 0.466           | 0.239           | 0.45             | 0.419            |                   |                   | 0.238             | 0.488             |                   |                |                 |                 |
| 03TS04_H2O           | 0.466           | 0.232           | 0.45             | 0.509            |                   |                   | 0.232             | 0.489             |                   | -1.083         | 0.515           | 0.443           |
| 04                   | 0.47            | 0.249           | 0.397            |                  |                   |                   | 0.275             | 0.49              |                   |                |                 |                 |
| 04_H2O               | 0.468           | 0.283           | 0.409            |                  |                   |                   | 0.257             | 0.273             | 0.484             | -1.066         | 0.513           | 0.514           |
| 03T03                | 0.47            | 0.25            |                  |                  |                   |                   | 0.268             | 0.492             |                   |                |                 |                 |
| 03b                  | 0.478           | 0.255           |                  |                  |                   |                   | 0.275             | 0.493             |                   |                |                 |                 |
| 03TS05               | 0.464           | 0.248           |                  |                  |                   |                   | 0.527             | 0.485             |                   | -0.921         | 0.567           | 0.532           |
| 03TS05_2H2O          | 0.462           | 0.245           |                  |                  |                   |                   | 0.529             | 0.485             |                   | -0.953         | 0.559           | 0.557           |
| 05a                  | 0.469           | 0.255           |                  |                  | 0.279             |                   |                   | 0.488             |                   |                |                 |                 |
| 05TS06               | 0.463           | 0.242           | 0.444            | 0.403            | 0.263             |                   |                   | 0.484             |                   |                |                 |                 |
| 05TS06_H2O           | 0.463           | 0.245           | 0.445            | 0.512            | 0.257             |                   |                   | 0.486             |                   | -1.078         | 0.518           | 0.432           |
| 06                   | 0.469           | 0.255           | 0.398            |                  | 0.265             |                   | 0.288             | 0.487             |                   |                |                 |                 |
| 05br05a              | 0.469           | 0.253           |                  |                  | 0.279             |                   |                   | 0.488             |                   |                |                 |                 |
| 05b                  | 0.468           | 0.267           |                  |                  | 0.278             |                   |                   | 0.488             |                   |                |                 |                 |
| 05TS07               | 0.464           | 0.27            | 0.444            | 0.459            | 0.264             |                   |                   | 0.474             |                   |                |                 |                 |
| 07                   | 0.465           | 0.266           | 0.498            | 0.487            | 0.258             |                   |                   | 0.434             |                   |                |                 |                 |
| 07TS08               | 0.464           | 0.271           | 0.469            | 0.499            | 0.271             |                   |                   | 0.477             |                   |                |                 |                 |
| 07TS08_H2O           | 0.465           | 0.271           | 0.472            | 0.514            | 0.271             |                   |                   | 0.472             |                   | -1.041         | 0.534           | 0.509           |
| 08a                  | 0.464           | 0.261           | 0.426            |                  | 0.275             |                   |                   | 0.498             | 0.501             |                |                 |                 |
| 08b                  | 0.464           | 0.259           | 0.427            |                  | 0.273             |                   |                   | 0.497             | 0.484             |                |                 |                 |
| 08TS09               | 0.463           | 0.261           | 0.463            |                  | 0.269             |                   |                   | 0.463             | 0.465             |                |                 |                 |
| 09                   | 0.468           | 0.244           | 0.497            |                  | 0.255             |                   |                   | 0.441             | 0.426             |                |                 |                 |
| 09TS10               | 0.464           | 0.261           | 0.468            |                  | 0.26              |                   |                   | 0.465             | 0.461             |                |                 |                 |
| 10                   | 0.463           | 0.258           | 0.424            |                  | 0.254             |                   |                   | 0.481             | 0.465             |                |                 |                 |

**Table 38:** NBO Energetic analysis with hyperconjugative delocalizations involving the acceptor and donor NBOs

|                              | Donor NBO (i)          | Acceptor NBO (j)         | E(2)<br>kcal/mol |
|------------------------------|------------------------|--------------------------|------------------|
| <b>EP01</b>                  |                        |                          |                  |
|                              | 43. LP ( 1)O 7         | /290. BD*( 1)N 9 - H     | 6.48             |
|                              | 44. LP ( 2)O 7         | /290. BD*( 1)N 9 - H     | 21.19            |
| <b>00TS01</b>                |                        |                          |                  |
|                              | 72. LP ( 1)O 7         | /495. BD*( 1)N 9 - H     | 0.94             |
|                              | 73. LP ( 2)O 7         | /495. BD*( 1)N 9 - H     | 2.42             |
|                              | 72. LP ( 1)O 7         | /500. BD*( 1)N 19 - H    | 1.40             |
|                              | 73. LP ( 2)O 7         | /500. BD*( 1)N 19 - H    | 2.36             |
| <b>01</b>                    |                        |                          |                  |
|                              | 74. LP ( 1)O 7         | /500. BD*( 1)N 19 - H    | 10.60            |
|                              | 75. LP ( 2)O 7         | /500. BD*( 1)N 19 - H    | 76.01            |
| <b>01TS02</b>                |                        |                          |                  |
|                              | 77. LP ( 1)O 7         | /519. BD*( 1)N 19 - H    | 1.75             |
|                              | 77. LP ( 1)O 7         | /542. BD*( 1)N 9 - H     | 1.21             |
|                              | 78. LP ( 2)O 7         | /519. BD*( 1)N 19 - H    | 3.93             |
|                              | 78. LP ( 2)O 7         | /542. BD*( 1)N 9 - H     | 3.14             |
| <b>02a</b>                   |                        |                          |                  |
|                              | 74. LP ( 1)O 7         | /495. BD*( 1)N 9 - H 9   | 8.32             |
|                              | 75. LP ( 2)O 7         | /495. BD*( 1)N 9 - H 9   | 40.84            |
| <b>02b</b>                   |                        |                          |                  |
|                              | 46. BD ( 2)C 11 - C 12 | /496. BD*( 1)N 9 - H1    | 5.60             |
|                              | 74. LP ( 1)O 7         | /495. BD*( 1)N 9 - H2    | 9.39             |
|                              | 75. LP ( 2)O 7         | /495. BD*( 1)N 9 - H2    | 52.61            |
| <b>02TS03</b>                |                        |                          |                  |
|                              | 72. LP ( 1)O 7         | /501. BD*( 1)N 19 - H    | 2.00             |
|                              | 73. LP ( 2)O 7         | /501. BD*( 1)N 19 - H    | 4.38             |
|                              | 46. BD ( 2)C 11 - C 12 | /496. BD*( 1)N 9 - H     | 2.28             |
| <b>03a</b>                   |                        |                          |                  |
|                              | 65. LP ( 1)O 7         | /435. BD*( 1)N 19 - H    | 6.45             |
|                              | 66. LP ( 2)O 7         | /435. BD*( 1)N 19 - H    | 21.07            |
| <b>03TS04_H<sub>2</sub>O</b> |                        |                          |                  |
|                              | 78. LP ( 1)O 7         | /516. BD*( 1)N 19 - H    | 6.03             |
|                              | 79. LP ( 2)O 7         | /516. BD*( 1)N 19 - H    | 18.73            |
| <b>04_H<sub>2</sub>O</b>     |                        |                          |                  |
|                              | 75. LP ( 1)O 7         | /489. BD*( 1)N 19 - H    | 5.96             |
|                              | 76. LP ( 2)O 7         | /489. BD*( 1)N 19 - H    | 19.19            |
| <b>03b</b>                   |                        |                          |                  |
|                              | 41. BD ( 2)C 11 - C 12 | /432. BD*( 1)N 19 - C 13 | 5.55             |
|                              | 65. LP ( 1)O 7         | /433. BD*( 1)N 19 - H    | 6.23             |
|                              | 66. LP ( 2)O 7         | /433. BD*( 1)N 19 - H    | 19.98            |

**03TS05\_2H<sub>2</sub>O**

|                         |                           |       |
|-------------------------|---------------------------|-------|
| 39. BD ( 1) C 11 - C 12 | /481. BD*( 1) N 19 - C 13 | 1.86  |
| 70. LP ( 1) O 7         | /482. BD*( 1) N 19 - H    | 7.26  |
| 71. LP ( 2) O 7         | /482. BD*( 1) N 19 - H    | 41.54 |

**05b**

|                          |                           |       |
|--------------------------|---------------------------|-------|
| 28. BD ( 1) C 11 - C 12  | /434. BD*( 1) C 13 - N 19 | 3.35  |
| 29. BD ( 2) C 11 - C 12  | /435. BD*( 2) C 13 - N 19 | 15.44 |
| 65. LP ( 1) O 7          | /438. BD*( 1) N 19 - H    | 6.96  |
| 66. LP ( 2) O 7          | /438. BD*( 1) N 19 - H    | 27.70 |
| 435. BD*( 2) C 13 - N 19 | /441. BD*( 2) C 11 - C 12 | 9.15  |

**05a**

|                          |                           |       |
|--------------------------|---------------------------|-------|
| 25. BD ( 1) C 11 - C 12  | /429. BD*( 1) C 13 - N 19 | 3.20  |
| 26. BD ( 2) C 11 - C 12  | /430. BD*( 2) C 13 - N 19 | 16.50 |
| 65. LP ( 1) O 7          | /433. BD*( 1) N 19        | 7.12  |
| 66. LP ( 2) O 7          | /433. BD*( 1) N 19        | 28.28 |
| 430. BD*( 2) C 13 - N 19 | /436. BD*( 2) C 11 - C 12 | 8.43  |

**05TS06\_H<sub>2</sub>O**

|                 |                        |       |
|-----------------|------------------------|-------|
| 83. LP ( 1) O 7 | /525. BD*( 1) N 19 - H | 7.57  |
| 84. LP ( 2) O 7 | /525. BD*( 1) N 19 - H | 36.86 |

**06**

|                 |                        |       |
|-----------------|------------------------|-------|
| 73. LP ( 1) O 7 | /490. BD*( 1) N 19 - H | 6.26  |
| 74. LP ( 2) O 7 | /490. BD*( 1) N 19 - H | 21.18 |

**05TS07**

|                         |                          |       |
|-------------------------|--------------------------|-------|
| 73. LP ( 1) O 7         | /501. BD*( 1) N 19       | 3.78  |
| 74. LP ( 2) O 7         | /501. BD*( 1) N 19       | 9.35  |
| 34. BD ( 2) C 12 - C 13 | /488. BD*( 1) C 9 - N 19 | 0.75  |
| 34. BD ( 2) C 12 - C 13 | /489. BD*( 2) C 9 - N 19 | 7.70  |
| 76. LP ( 1) O 17        | /492. BD*( 1) N 9 - H 1  | 0.10  |
| 76. LP ( 1) O 17        | /493. BD*( 1) N 9 - H 2  | 4.98  |
| 77. LP ( 2) O 17        | /493. BD*( 1) N 9 - H 2  | 0.29  |
| 75. LP ( 1) N 9         | /488. BD*( 1) C 9 - N 19 | 0.15  |
| 75. LP ( 1) N 9         | /489. BD*( 2) C 9 - N 19 | 95.49 |
| 33. BD ( 1) C 12 - C 13 | /488. BD*( 1) C 9 - N 19 | 3.07  |

**07**

|                  |                           |       |
|------------------|---------------------------|-------|
| 73. LP ( 1) O 7  | /515. BD*( 1) N 19 - H1   | 7.35  |
| 74. LP ( 2) O 7  | /515. BD*( 1) N 19 - H1   | 28.07 |
| 79. LP ( 1) O 17 | /516. BD*( 1) N 19 - H2   | 5.53  |
| 80. LP ( 2) O 17 | /516. BD*( 1) N 19 - H3   | 1.82  |
| 76. LP ( 1) N 9  | /497. BD*( 1) C 12 - C 13 | 3.00  |
| 76. LP ( 1) N 9  | /498. BD*( 2) C 12 - C 13 | 16.38 |

**07TS08\_H<sub>2</sub>O**

|                 |                        |      |
|-----------------|------------------------|------|
| 77. LP ( 1) O 7 | /519. BD*( 1) N 19 - H | 1.54 |
| 77. LP ( 1) O 7 | /543. BD*( 1) N 9 - H  | 1.57 |
| 78. LP ( 2) O 7 | /519. BD*( 1) N 19 - H | 4.00 |
| 78. LP ( 2) O 7 | /543. BD*( 1) N 9 - H  | 3.77 |

|                        |                         |       |
|------------------------|-------------------------|-------|
| 25. BD ( 2)C 12 - C 13 | /515. BD*( 1)C 8 - N 19 | 4.12  |
| 24. BD ( 1)C 12 - C 13 | /515. BD*( 1)C 8 - N 19 | 0.86  |
| <b>08a</b>             |                         |       |
| 73. LP ( 1)O 7         | /500. BD*( 1)N 19 - H   | 6.91  |
| 74. LP ( 2)O 7         | /500. BD*( 1)N 19 - H   | 26.75 |
| 76. LP ( 1)N 9         | /489. BD*( 1)C 8 - N 19 | 6.69  |
| 76. LP ( 1)N 9         | /501. BD*( 1)N 19 - H   | 1.24  |
| 77. LP ( 1)O 17        | /501. BD*( 1)N 19 - H   | 7.65  |
| 78. LP ( 2)O 17        | /501. BD*( 1)N 19 - H   | 10.75 |
| 33. BD ( 2)C 12 - C 13 | /489. BD*( 1)C 8 - N 19 | 3.98  |
| 32. BD ( 1)C 12 - C 13 | /489. BD*( 1)C 8 - N 19 | 0.61  |
| <b>08b</b>             |                         |       |
| 80. LP ( 2)O 17        | /501. BD*( 1)N 19 - H   | 10.34 |
| 79. LP ( 1)O 17        | /501. BD*( 1)N 19 - H   | 6.83  |
| 74. LP ( 1)O 7         | /500. BD*( 1)N 19 - H   | 8.65  |
| 75. LP ( 2)O 7         | /500. BD*( 1)N 19 - H   | 42.10 |
| <b>08TS09</b>          |                         |       |
| 34. BD ( 2)C 12 - C 13 | /489. BD*( 1)C 8 - N 19 | 6.75  |
| 74. LP ( 2)O 7         | /492. BD*( 1)N 10 - H   | 2.57  |
| 74. LP ( 2)O 7         | /500. BD*( 1)N 19 - H1  | 2.57  |
| 76. LP ( 1)O 17        | /501. BD*( 1)N 19 - H2  | 5.79  |
| 77. LP ( 2)O 17        | /501. BD*( 1)N 19 - H2  | 8.79  |
| 75. LP ( 1)N 9         | /489. BD*( 1)C 8 - N 19 | 69.55 |
| <b>09TS10</b>          |                         |       |
| 73. LP ( 1)O 7         | /492. BD*( 1)N 9 - H    | 1.17  |
| 73. LP ( 1)O 7         | /509. BD*( 1)N 19 - H 1 | 6.72  |
| 74. LP ( 2)O 7         | /492. BD*( 1)N 9 - H    | 4.33  |
| 74. LP ( 2)O 7         | /509. BD*( 1)N 19 - H1  | 7.22  |
| 77. LP ( 1)O 17        | /508. BD*( 1)N 19 - H2  | 3.41  |
| 78. LP ( 2)O 17        | /508. BD*( 1)N 19 - H2  | 4.33  |
| <b>10</b>              |                         |       |
| 73. LP ( 1)O 7         | /509. BD*( 1)N 19 - H1  | 12.25 |
| 74. LP ( 2)O 7         | /492. BD*( 1)N 9 - H    | 0.53  |
| 74. LP ( 2)O 7         | /509. BD*( 1)N 19 - H1  | 49.38 |
| 78. LP ( 2)O 17        | /508. BD*( 1)N 19 - H2  | 4.97  |
| 77. LP ( 1)O 17        | /508. BD*( 1)N 19 - H2  | 3.92  |

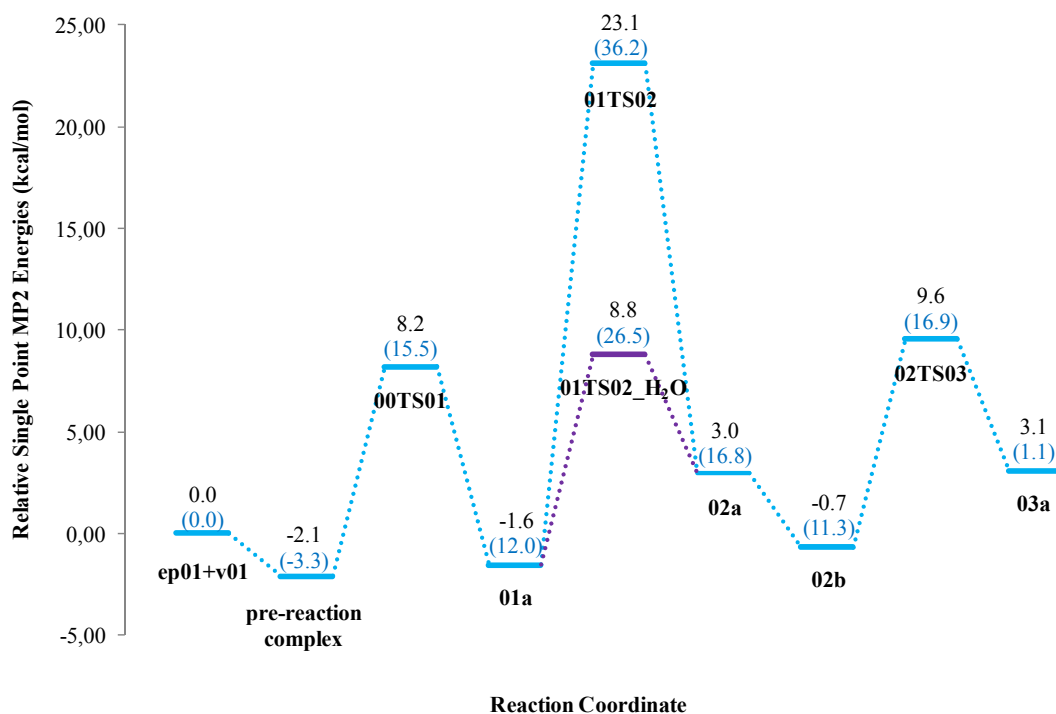

**Figure 1:** Single point relative MP2 energies for External Aldimine Formation Pathway (Relative Gibbs free energies from gas phase optimization calculations are written in parantheses, energies are given in kcal/mol)

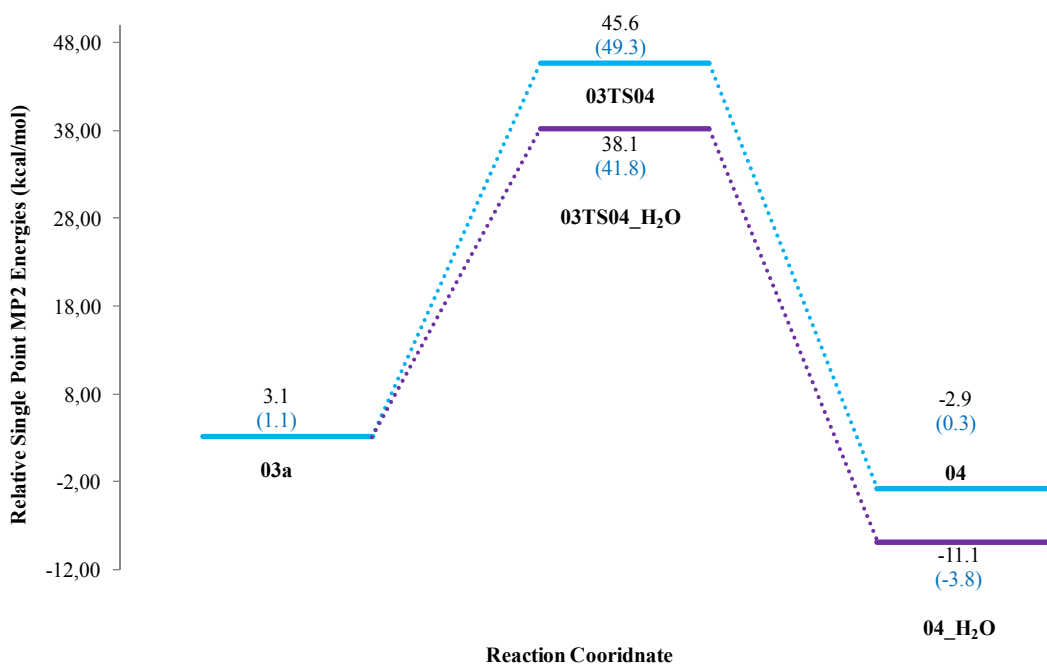

**Figure 2:** Single point relative MP2 energies for Michael Addition Pathway (Relative Gibbs free energies from gas phase optimization calculations are written in parantheses, energies are given in kcal/mol)

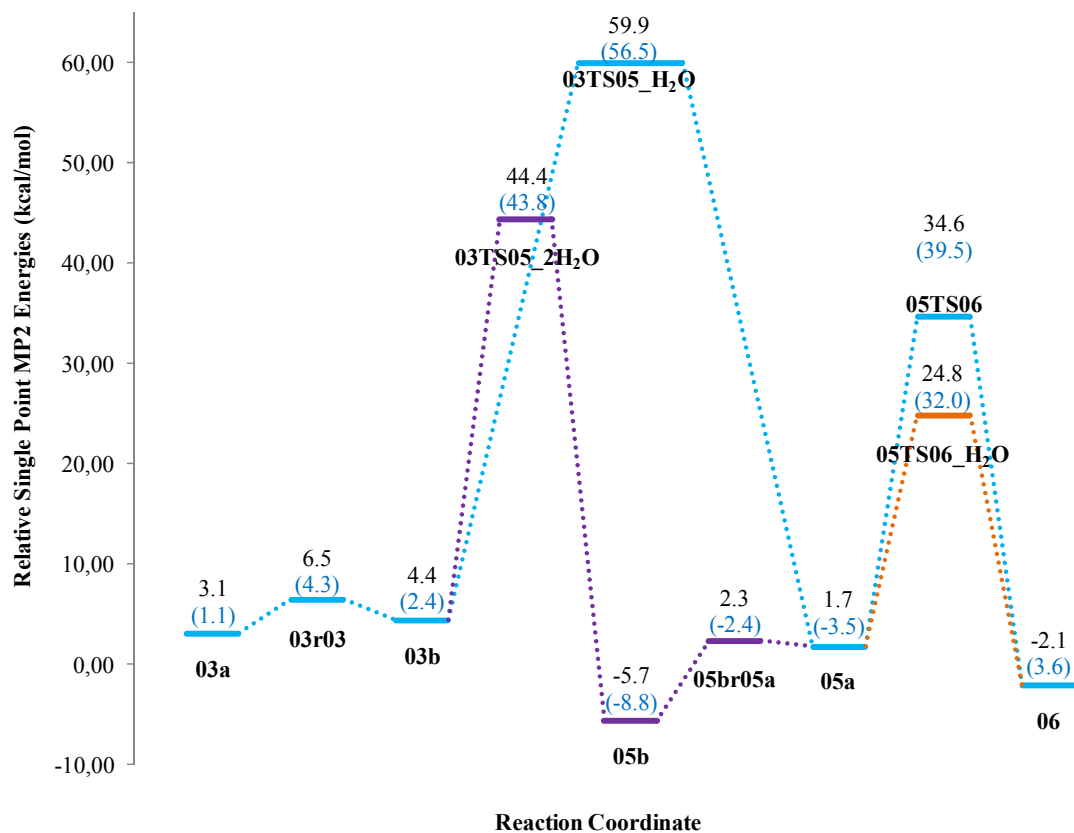

**Figure 3:** Single point relative MP2 energies for Enamine Michael Addition Pathway (Relative Gibbs free energies from gas phase optimization calculations are written in parantheses, energies are given in kcal/mol)



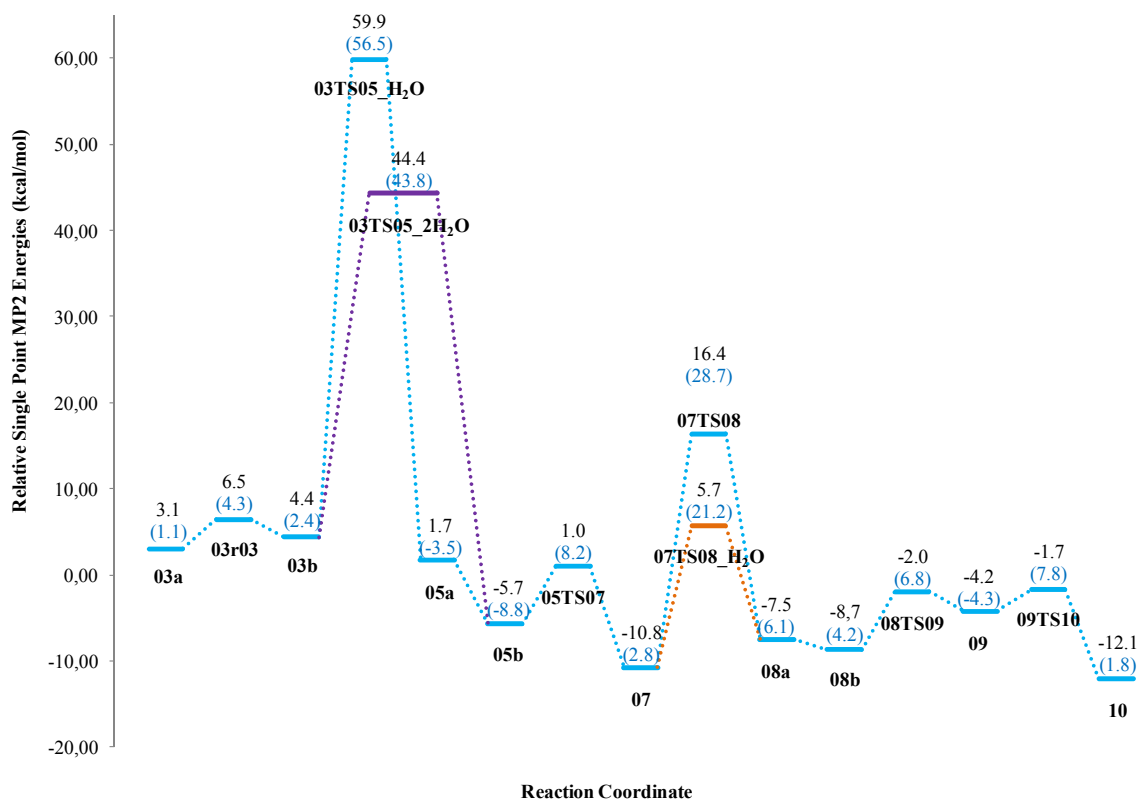

**Figure 4:** Single point relative MP2 energies for Enamine Pathway (Relative Gibbs free energies from gas phase optimization calculations are written in parantheses, energies are given in kcal/mol)
